# Supplementary material for: Transmembrane Protein TMEM230, Regulator of Glial Cell Vascular Mimicry and Endothelial Cell Angiogenesis in High-Grade Heterogeneous Infiltrating Gliomas and Glioblastoma
Source: MDPI journal article supplement (doi:10.3390/ijms25073967), 2024-04-03
Supplement: s1 [file s1]

**Supplementary Table S2.** Genes and pathways identified with increased glioma grade and TMEM230 upregulation in oligodendroglioma (ODG). TMEM230 regulates components of endomembrane system associated with cargo trafficking and secretion: Golgi complex and endoplasmic reticulum (see figure 7). Expression analysis correlated all genes differentially expressed with up-regulation of TMEM230 (p adjusted value of < or = 0.05, Supplementary Table 1). Gene Ontology and biological pathways were assessed using the False Discovery Rate method (p-adjusted value) as shown.

| Endomembrane system genes modulated in ODG<br>with TMEM230-high vs TMEM230-low                                                                                                                                                                                                                                                                                                                                                                                                                                                                                                                                                                                                                                                                                                                     |                                                                                                                                                                                                                                                                                                                                                                                                                                                                                                                                                                                                                                                                                                                                                                                                                                                                                                                                                                                                                                                                                                                                                                                                                                                                                                                                                                                                                                                                                                                                                                                                                                                                                                                                                                                                                                                                                                                                                                                                                                                                                                                                                                                                                                                                                                                                                                                                                                                                                                                                                                                                                                                                                                                                                                                                                                                                                                                                                                                                                                                                                                                                                                                                                                                                                                                                                                                                                                                                                                                                                                                                                                                                                                                                                                                                                                                                                                                                                                                                                                                                                                                                                                                                                                                                                                                       |
|----------------------------------------------------------------------------------------------------------------------------------------------------------------------------------------------------------------------------------------------------------------------------------------------------------------------------------------------------------------------------------------------------------------------------------------------------------------------------------------------------------------------------------------------------------------------------------------------------------------------------------------------------------------------------------------------------------------------------------------------------------------------------------------------------|-----------------------------------------------------------------------------------------------------------------------------------------------------------------------------------------------------------------------------------------------------------------------------------------------------------------------------------------------------------------------------------------------------------------------------------------------------------------------------------------------------------------------------------------------------------------------------------------------------------------------------------------------------------------------------------------------------------------------------------------------------------------------------------------------------------------------------------------------------------------------------------------------------------------------------------------------------------------------------------------------------------------------------------------------------------------------------------------------------------------------------------------------------------------------------------------------------------------------------------------------------------------------------------------------------------------------------------------------------------------------------------------------------------------------------------------------------------------------------------------------------------------------------------------------------------------------------------------------------------------------------------------------------------------------------------------------------------------------------------------------------------------------------------------------------------------------------------------------------------------------------------------------------------------------------------------------------------------------------------------------------------------------------------------------------------------------------------------------------------------------------------------------------------------------------------------------------------------------------------------------------------------------------------------------------------------------------------------------------------------------------------------------------------------------------------------------------------------------------------------------------------------------------------------------------------------------------------------------------------------------------------------------------------------------------------------------------------------------------------------------------------------------------------------------------------------------------------------------------------------------------------------------------------------------------------------------------------------------------------------------------------------------------------------------------------------------------------------------------------------------------------------------------------------------------------------------------------------------------------------------------------------------------------------------------------------------------------------------------------------------------------------------------------------------------------------------------------------------------------------------------------------------------------------------------------------------------------------------------------------------------------------------------------------------------------------------------------------------------------------------------------------------------------------------------------------------------------------------------------------------------------------------------------------------------------------------------------------------------------------------------------------------------------------------------------------------------------------------------------------------------------------------------------------------------------------------------------------------------------------------------------------------------------------------------------------------|
| Glycosylation site: N-linked (p-adjusted value 5.77784E-34)                                                                                                                                                                                                                                                                                                                                                                                                                                                                                                                                                                                                                                                                                                                                        |                                                                                                                                                                                                                                                                                                                                                                                                                                                                                                                                                                                                                                                                                                                                                                                                                                                                                                                                                                                                                                                                                                                                                                                                                                                                                                                                                                                                                                                                                                                                                                                                                                                                                                                                                                                                                                                                                                                                                                                                                                                                                                                                                                                                                                                                                                                                                                                                                                                                                                                                                                                                                                                                                                                                                                                                                                                                                                                                                                                                                                                                                                                                                                                                                                                                                                                                                                                                                                                                                                                                                                                                                                                                                                                                                                                                                                                                                                                                                                                                                                                                                                                                                                                                                                                                                                                       |
| Genes Down-regulated                                                                                                                                                                                                                                                                                                                                                                                                                                                                                                                                                                                                                                                                                                                                                                               | Genes Up-regulated                                                                                                                                                                                                                                                                                                                                                                                                                                                                                                                                                                                                                                                                                                                                                                                                                                                                                                                                                                                                                                                                                                                                                                                                                                                                                                                                                                                                                                                                                                                                                                                                                                                                                                                                                                                                                                                                                                                                                                                                                                                                                                                                                                                                                                                                                                                                                                                                                                                                                                                                                                                                                                                                                                                                                                                                                                                                                                                                                                                                                                                                                                                                                                                                                                                                                                                                                                                                                                                                                                                                                                                                                                                                                                                                                                                                                                                                                                                                                                                                                                                                                                                                                                                                                                                                                                    |
| XYLT1, GPR173, CREB3L4, CREB3L1, GPR161, CHST11, GALR1, FLRT1, PCDHA4, LRRC37A2, GPR17, BTBD17, GRIN3A, PCDHB2, GPR27, MAMDC4, AHSG, TMC3, MMP16, ANGPTL2, RGR, DSCAML1, GPR45, COL11A2, ADAM22, SEZ6, GLRA1, ADAM29, GCNT2, CSMD3, SLC17A8, GPR158, BCHE, SULF2, SLC8A3, SMOC1, SEMA5A, ITGA2B, TNFR, SLC38A1, KCNH7, SLC9A3, LPAL2, CLEC4F, COL17A1, SLC26A1, SLC14A2, LRIT2, CSPG5, ALK, TSPAN11, AMH, ADAMTS6, GRID2, SEZ6L, NLGN3, SLC24A3, LRP4, PTPRZ1, CACNG2, CACNG4, P2RX3, MDGA2, KCNK3, THSD7A, SLC6A18, KCNK10, STC2, SCN3A, PCDH20, LRRN4, LRRN1, IGSF9B, GRIK2, ROBO1, KCNT2, NOG, MST1, GFRA1, RGM, GABBR1, GALNT13, CELSR3, DSCAM, CACNA1A, WSCD1, INHBC, BMP2, MEGF11, LRRTM3, LRRTM4, MADCAM1, ABCC8, PCDHGA3, SSTR2, CDHR1, LCAT, DLL1, ACAN, SLIT1, PCDHGC4, PCDHGC3, FAM155A | VIT, TMEM200B, COL12A1, MRGPRF, SLC4A2, SPINT2, F11R, GLDN, FGFR1, ISLR, LIPC, GPR171, C3AR1, BVES, IER3, SERPINF1, SERPINF2, RNASE6, RNASE3, RNASE2, RNASE1, DKK2, SIGIRR, SPINT1, GPR160, PLBD1, SERPING1, CFB, CFH, HPN, CFI, CLCNKB, FPR1, IL20RA, PDGFA, LYPD3, FPR2, LYPD6, C2, ADAMTS16, C3, ADAMTS14, C6, C7, PDGFD, SERPINH1, PROM1, HLA-DQA2, HLA-DQA1, C19ORF38, ST3GAL3, NGFR, HLA-DRB5, FZD2, FZD5, ABCA5, MCAM, FUCA1, ABCA4, FZD6, FUCA2, FZD9, FZD8, ABCA7, CP, COL1A1, COL1A2, TNFSF8, HLA-DRB1, RET, SERPINA3, SERPINA1, SIGLEC9, WFIKKN2, PRSS23, PHEX, ASGR2, SERPINA5, MRC2, GPR132, ADAMTSL4, ADAMTSL3, TCTN2, MRC1, CTLA4, OLR1, EMB, TIMP1, CTBS, HLA-DPA1, HAVCR2, CHST8, CHST6, CLUL1, GPR37, SLC2A10, NFAM1, MAMDC2, TMC8, EMP1, EMP3, F3, BACE2, CD200R1, COL2A1, GPRC5A, SLC7A7, ANGPTL7, COL21A1, GAS6, CHST2, HLA-DQB1, CRB2, GCNT1, PTAFR, FSTL1, PTGS1, HLA-DMA, ADAM28, HLA-DMB, FRZB, OLFML3, TMEM67, OLFML1, APOL1, IL12RB1, C11ORF45, RNF130, LEFTY2, LRRC25, EVC2, P2RY13, IL10RA, GPR55, ADAM33, GPR1, VWA3A, PRSS36, KIAA2013, SULF1, PLXDC2, TMEM156, GPR143, SLC3A1, RNF149, CLCF1, HLA-DPB1, PLP2, FMOD, LGR6, CCL28, OLFML2B, CSF3R, GPR65, TNC, F13A1, PLOD1, EFEMP2, HPGDS, PODNL1, EFEMP1, ADORA3, LAMP3, CLEC5A, TNFRSF8, HLA-DOA, SLC39A4, IL13RA1, LAG3, TICAM2, COL27A1, BSCL2, MFNG, ROR1, FKBP9, ROR2, DSC2, CHODL, CSF1R, CD274, KCNE1, KCNE3, GPR88, TACSTD2, LY96, TNFRSF11B, AEBP1, GPR84, TNFRSF11A, SLC9A1, CLEC7A, TNFRSF14, SLC15A3, CD300LE, NPTX2, PLTP, CPA4, KL, CD163, SLC37A2, HTR1D, LY86, CYBRD1, LRRC66, IGSF10, PTPRC, P4HA3, ITGA11, OGN, HLA-DRA, SP9, CNTNAP3, KCNK5, MOXD1, ST6GALNAC2, ITGAM, ITGB5, COL14A1, ITGB4, ITGB3, ITGB2, LECT1, ECE1, TREM2, CPZ, ITGAL, MSLN, WISP1, TSPAN10, ADAMTS4, SPN, SCPEP1, FCGR3A, ADAMTS3, EMILIN3, EMILIN2, ITGB7, EMILIN1, TNFSF12-TNFSF13, ADAMTS7, SLC13A3, RNASET2, ITGA2, ADRA2C, TNFRSF1B, ADRA2A, ASPN, TNFRSF1A, NPC2, DSG2, MET, ST6GALNAC5, COL15A1, SEMA3C, C1S, FRRS1, C1R, UNC93B1, SEMA3A, FGL2, NTN5, SEMA3F, IL2RG, COCH, CECR1, P2RY6, P2RY2, CEACAM21, FCGR1A, FCGR1B, CTHRC1, LINGO2, SEMA4D, ANGPT1, MBOAT7, GZMA, GZMH, MFAP5, MFAP4, FCGR2A, FRAS1, CLEC2B, TSPAN19, P2RX1, IL2RB, PI16, EVI2B, FCGR2B, FOLR2, FOLR1, CBLN3, FCGR2C, CD244, OXTR, PRF1, LDLRAD2, ICAM4, KLHDC7A, AQP5, IFI30, LCTL, AQP3, ICAM1, AQP1, C4A, NIPAL3, OXER1, EPHB2, SYNPO, ICOSLG, HABP2, SLC34A2, IL15RA, EPHA4, EPHA7, SLC6A16, IL1R1, SLC11A1, KCNK13, TIMD4, HLA-G, GBGT1, SFRP4, FNDC1, CD109, KCNQ1, CD226, CD101, CES1, SLC45A2, IGSF3, GYPC, IGSF1, EBI3, LPAR1, TMTC2, CD79B, CD79A, CD19, ST8SIA4, ARSI, SLAMF6, TSPAN2, CD14, APOB, SLAMF1, CCR1, NTNG1, MSRI, SIGLEC14, SIGLEC11, TNFSF13, SIGLEC10, GDF5, VASN, BST2, BST1, TG, LPAR5, ARTN, LPAR6, SDC1, PTPRU, COL18A1, CD40, SLC44A3, ECM2, CTSZ, SECTM1, CTSW, GRIK1, CD3D, WFDC2, CTSS, PTPRF, SLC22A15, STAB1, CTSH, CD37, CTSC, CD33, CCR2, IL10, CD53, CD52, IL15, ANO9, ANO6, MMEL1, PDCD1LG2, GFRA3, OSMR, GFRA2, TLR1, CEACAM1, B3GNT8, CDCP1, NOV, B3GNT7, B3GNT5, TLR8, VWA1, B3GNT2, TLR7, CD302, TLR5, CD44, MATN2, TLR2, PTGER4, C1QA, SELPLG, TNXB, TMPSR3, PTGER2, PTGER3, AMIGO2, GDPD2, CXCR6, CST7, LILRA2, RELN, CXCR3, KISS1R, GPC3, SUSP3, GPC4, CD58, GABRE, CD55, LAIR1, MICB, MPZL2, CD74, CD72, GDF15, SUSP2, DKKL1, OSM, LILRB1, LILRB2, FAP, QPCT, CACHD1, F2RL1, CD69, CD68, F2RL2, CD86, FCGBP, STEAP3, CD83, HFE, SIRPG, NPY2R, MPL, CLEC18C, LOXL4, CLEC18B, PLAT, CELSR1, CLEC18A, PLB1, PLAUI, SIT1, C1RL, FAM3B, ENPPI, PRND, CD96, POSTN, CD300A, APLP1, CYBB, PCOLCE, ATP1B1, PDGFRL, OSCAR, LOX, CSNN1A, ADAM12, COL4A6, COL4A5, CD300C, KLRB1, C5AR1, CHRNA9, FBLN1, CSF2RB, LTBP2, SLC1A5, CACNA1F, FBLN2, NID2, CSF2RA, EFNA4, LTBP1, PLD3, FBLN5, DPP4, EFNB2, CACNA1S, WNT2, WNT4, TGFB2, OPN3, VCAM1, TGFB1, PTCH2, RARRES1, CRTAM, TRPV2, EPHX3, PROC, COL5A2, FGFR3, ULBP1, ULBP3, WNT2B, B4GALT1, MEGF10, TNFAIP6, SIRPB2, SLC2A5, HS2ST1, BDKRB2, MAN1A1, CA9, SCN5A, ABCC3, EGFL6, PLAUR, WNT16, MMP9, TGFB3, GREM1, RCN3, COL6A2, TMEM217, CHI3L2, CASQ2, CHI3L1, COL6A3, LTB, LTF, COLEC12, LAMA2, TM2D1, LAMA4, TFPI, THBS1, KDELC2, MAN1C1, SCN7A, LRIG3, SLIT3, S1PR3, CHSY3, TAS1R1, GALNT4, GALNT3, LGI4, EGF, LAMB1, SOD3, HS3ST1, CD2, CD4, CD6, CD5, CD7, PMP22, LTBR |
| Endoplasmic reticulum Lumen (Benjamini padj 3.41952E-06)                                                                                                                                                                                                                                                                                                                                                                                                                                                                                                                                                                                                                                                                                                                                           |                                                                                                                                                                                                                                                                                                                                                                                                                                                                                                                                                                                                                                                                                                                                                                                                                                                                                                                                                                                                                                                                                                                                                                                                                                                                                                                                                                                                                                                                                                                                                                                                                                                                                                                                                                                                                                                                                                                                                                                                                                                                                                                                                                                                                                                                                                                                                                                                                                                                                                                                                                                                                                                                                                                                                                                                                                                                                                                                                                                                                                                                                                                                                                                                                                                                                                                                                                                                                                                                                                                                                                                                                                                                                                                                                                                                                                                                                                                                                                                                                                                                                                                                                                                                                                                                                                                       |
| Genes Down-regulated                                                                                                                                                                                                                                                                                                                                                                                                                                                                                                                                                                                                                                                                                                                                                                               | Genes Up-regulated                                                                                                                                                                                                                                                                                                                                                                                                                                                                                                                                                                                                                                                                                                                                                                                                                                                                                                                                                                                                                                                                                                                                                                                                                                                                                                                                                                                                                                                                                                                                                                                                                                                                                                                                                                                                                                                                                                                                                                                                                                                                                                                                                                                                                                                                                                                                                                                                                                                                                                                                                                                                                                                                                                                                                                                                                                                                                                                                                                                                                                                                                                                                                                                                                                                                                                                                                                                                                                                                                                                                                                                                                                                                                                                                                                                                                                                                                                                                                                                                                                                                                                                                                                                                                                                                                                    |

|                                                                 |                                                                                                                                                                                                                                                                                                                                                  |
|-----------------------------------------------------------------|--------------------------------------------------------------------------------------------------------------------------------------------------------------------------------------------------------------------------------------------------------------------------------------------------------------------------------------------------|
| COL17A1, COL11A2, BCHE                                          | COL18A1, COL15A1, SERPINA1, COL14A1, COL12A1, CTSZ, PDGFA, THBS1, LIPC, KDELC2, ADAMTSL4, PDGFD, SERPINH1, ARSI, APOB, CTSC, WNT4, ADAMT57, COL27A1, RNASET2, PLAUR, GPX8, GPX7, PDIA5, RCN3, COL1A1, COL3A1, CD4, COL2A1, PROC, COL1A2, COL5A1, P4HA3, COL6A2, COL5A2, COL4A6, COL8A2, COL4A5, RDH5, COL6A3, COL8A1, COL21A1, ERP27, GAS6, CES1 |
| <b>Endocytic vesicle membrane (p-adjusted value 4.8375E-04)</b> |                                                                                                                                                                                                                                                                                                                                                  |
| <b>Genes Down-regulated</b>                                     | <b>Genes Up-regulated</b>                                                                                                                                                                                                                                                                                                                        |
| GPR161, CACNG2, CACNG4                                          | COLEC12, MSR1, CD74, CD163, HLA-DRB5, STAB1, HLA-DPB1, AP2S1, HLA-DRA, PICK1, HLA-DQA2, HLA-DQA1, HLA-DQB2, HLA-DRB1, WLS, HLA-DPA1, HLA-DQB1, WNT4                                                                                                                                                                                              |
| <b>Proteoglycans in cancer (p-adjusted value 7.62698E-04)</b>   |                                                                                                                                                                                                                                                                                                                                                  |
| <b>Genes Down-regulated</b>                                     | <b>Genes Up-regulated</b>                                                                                                                                                                                                                                                                                                                        |
| ANK1                                                            | WNT2B, ITGB5, SDC4, ITGB3, SDC2, PIK3CD, TWIST1, IQGAP1, THBS1, PIK3CG, SLC9A1, PIK3R5, CDC42, PLAUR, PLCG2, GPC3, FLNA, PLCE1, FLNC, WNT2, WNT4, TGFB2, TGFB1, FZD2, FZD5, LUM, HGF, ITGA2, FZD6, FZD9, PLAUR, IGF2, FZD8, MSN, IGF1, WNT16, MMP9, MAPK13, SDC1, HCLSL1, PTPN6, MET, CD44, TLR2                                                 |
| <b>Proteoglycan (p-adjusted value 1.097553E-03)</b>             |                                                                                                                                                                                                                                                                                                                                                  |
| <b>Genes Down-regulated</b>                                     | <b>Genes Up-regulated</b>                                                                                                                                                                                                                                                                                                                        |
| ACAN, TNFR, CSPG5                                               | SRGN, CD74, SDC4, LUM, SDC2, TGFBR3, SRPX2, GPC3, SDC1, GPC4, FMOD, CD44, ADAMT57                                                                                                                                                                                                                                                                |

**Supplementary Table S3.** Genes and pathways identified with increased glioma grade and TMEM230 upregulation. TMEM230 regulates motor protein dependent intracellular trafficking and secretion of metalloproteinases (ADAMs and MMPs) and phagosomes for microchannel formation. (see figure 7). Expression analysis correlated all genes differentially expressed with up-regulation of TMEM230 (p adjusted value of  $\leq 0.05$ , Supplementary Table 1). Gene Ontology and biological pathways were assessed using the False Discovery Rate method as shown.

| <b>Trafficked and secreted factor and vesicle associated genes modulated in ODG with TMEM230-high vs TMEM230-low</b>                                                                                                                                   |                                                                                                                                                                                                                                                                                                                                                                                                                                                                                                                                                                                                                                                                                                                                                                                                                                                                                                                                                                                                                                                                                                                                                                                                                                                                                                                                                                                                                                                                                                                                                                                                                                                                                                                                                                                                                                                                                                                                                                                                                                                                                                                                                                                                                                                                                                                     |
|--------------------------------------------------------------------------------------------------------------------------------------------------------------------------------------------------------------------------------------------------------|---------------------------------------------------------------------------------------------------------------------------------------------------------------------------------------------------------------------------------------------------------------------------------------------------------------------------------------------------------------------------------------------------------------------------------------------------------------------------------------------------------------------------------------------------------------------------------------------------------------------------------------------------------------------------------------------------------------------------------------------------------------------------------------------------------------------------------------------------------------------------------------------------------------------------------------------------------------------------------------------------------------------------------------------------------------------------------------------------------------------------------------------------------------------------------------------------------------------------------------------------------------------------------------------------------------------------------------------------------------------------------------------------------------------------------------------------------------------------------------------------------------------------------------------------------------------------------------------------------------------------------------------------------------------------------------------------------------------------------------------------------------------------------------------------------------------------------------------------------------------------------------------------------------------------------------------------------------------------------------------------------------------------------------------------------------------------------------------------------------------------------------------------------------------------------------------------------------------------------------------------------------------------------------------------------------------|
| <b>Secreted (p-adjusted value 6.51983E-25)</b>                                                                                                                                                                                                         |                                                                                                                                                                                                                                                                                                                                                                                                                                                                                                                                                                                                                                                                                                                                                                                                                                                                                                                                                                                                                                                                                                                                                                                                                                                                                                                                                                                                                                                                                                                                                                                                                                                                                                                                                                                                                                                                                                                                                                                                                                                                                                                                                                                                                                                                                                                     |
| <b>Genes Down-regulated</b>                                                                                                                                                                                                                            | <b>Genes Up-regulated</b>                                                                                                                                                                                                                                                                                                                                                                                                                                                                                                                                                                                                                                                                                                                                                                                                                                                                                                                                                                                                                                                                                                                                                                                                                                                                                                                                                                                                                                                                                                                                                                                                                                                                                                                                                                                                                                                                                                                                                                                                                                                                                                                                                                                                                                                                                           |
| XYLT1, THSD7A, CHGB, STC2, FLRT1, BTBD17, CRTAC1, FGFBP3, AHSG, NOG, MST1, <b>MMP16</b> , ANGPTL2, DNASE1L3, COL11A2, BCHE, GABBR1, SMOC1, TNFR, DSCAM, LPA1, COL17A1, PDZD2, INHBC, BMP2, VWC2L, AMH, <b>ADAMT56</b> , LCAT, ACAN, PTPRZ1, SLIT1, TUB | VIT, SPON2, COL12A1, PRF1, ICAM4, IFI30, GLDN, C4A, LGALS3, ISLR, LGALS1, LIPC, PROK2, LGALS9, HABP2, FAM19A3, IL15RA, MIA, IL1R1, SERPINF1, SERPINF2, RNASE6, RNASE4, RNASE3, RNASE1, DKK2, SFRP4, SPINT1, FNDC1, COL8A2, SERPING1, COL8A1, NBL1, CFB, CFH, SDC4, DHH, IGSF1, CFI, EBI3, PDGFA, PLA2G5, LYPD6, C2, <b>ADAMT516</b> , C3, <b>ADAMT514</b> , C6, C7, SCGB1D2, PDGFD, S100A13, ARSI, CD14, APOB, ST3GAL3, SLAMF1, GSDMD, TNFSF13, SIGLEC10, FUCA2, IGF2, IGF1, PGA3, GDF5, CP, PGA5, VASN, PGA4, COL1A1, COL1A2, TG, ARTN, SDC1, HAMP, SERPINA3, COL18A1, CD40, SERPINA1, ECM2, C2CD2, WFIKN2, SECTM1, PRSS23, WFDC2, SERPINA5, ESM1, <b>ADAMT514</b> , GNLY, <b>ADAMT513</b> , OLR1, TIMP1, IL10, CLUL1, ANXA1, FGFBP2, ANXA2, IL15, MAMDC2, IL18, MMEL1, PDCD1LG2, OTOS, F3, CEACAM1, CD200R1, COL2A1, CDCP1, NOV, ANGPTL7, COL21A1, VWA1, GAS6, MATN2, C1QB, CRB2, C1QA, CTF1, TNXB, LRRC17, CAPG, LILRA2, CST7, FSTL1, APOL4, <b>ADAM28</b> , RELN, SRPX2, OLFML3, FRZB, OLFML1, GPC3, GPC4, C11ORF45, APOL1, LEFTY2, CD55, CCL25, CCL22, GSN, RNLS, CCL20, GDF15, OSM, DKK1, LILRB1, VWA3A, PRSS36, COL3A1, FAP, ADM2, QPCT, CLCF1, C16ORF89, CCDC3, FMOD, CCL28, C1QC, FCGBP, OLFML2B, CSF3R, TNC, CLEC18C, CLEC18B, F13A1, LOXL4, PLAT, FGF1, CXCL14, CLEC18A, LOXL1, EFEMP2, PODNL1, EFEMP1, PLAUR, C1RL, FAM3B, ENPP1, POSTN, COL27A1, IGFBP2, PCOLCE, NPNT, THNSL2, PDGFRL, OSCAR, LOX, CD8A, <b>ADAM12</b> , COL4A6, COL4A5, LY96, FBLN1, C1ORF54, TNFRSF11B, LTBP2, AEBP1, NTS, FBLN2, NID2, EFNA4, CSF2RA, LTBP1, FBLN5, DPP4, NLRP3, CYTL1, IGFBP6, NPTX2, PLTP, WNT2, CPA4, WNT4, KL, CD163, TGFB2, TGFB1, RARRES2, LY86, EPHX3, ISG15, ABHD15, CXCL10, IGSF10, CXCL11, CXCL12, PROC, COL5A1, COL5A2, OGN, ANXA2P2, FGFR3, CNTNAP3, CXCL6, CXCL9, B4GALT1, WNT2B, C2ORF40, COL14A1, LECT1, TREM2, TRH, CPZ, DMKN, MSLN, WISP1, CYR61, <b>ADAMT54</b> , SCPEP1, FCGR3A, <b>ADAMT53</b> , CASP4, EMILIN3, EMILIN2, EMILIN1, TNFSF12-TNFSF13, C3ORF58, <b>ADAMT57</b> , SRGN, <b>MMP7</b> , EGFL6, RNASET2, PLAUR, GPX7, WNT16, C1QL4, TNFRSF1B, <b>MMP9</b> , ASPN, TNFRSF1A, TGFBR3, GREM1, OAS1, NPC2, COL6A2, CHI3L2, CHI3L1, COL6A3, ANG, MET, LTF, COLEC11, COL15A1, SEMA3C, LAMA2, SEMA3A, LAMA4, FGL2, NTN5, SEMA3F, TFPI, PTHLH, COCH, CECR1, CCL5, SLIT3, GBP1, CTHRC1, ANGPT1, |

|                                                    |                                                                                                                                                                                                                                                                                                                                                               |
|----------------------------------------------------|---------------------------------------------------------------------------------------------------------------------------------------------------------------------------------------------------------------------------------------------------------------------------------------------------------------------------------------------------------------|
|                                                    | LGI4, LUM, GZMA, LAMB1, SOD3, MFAP5, GZMK, MFAP4, CD6, C9ORF47, APOC2, MFAP2, HCG22, PI16, FOLR2, CBLN3, FOLR1                                                                                                                                                                                                                                                |
| <b>Phagosome (p-adjusted value 2.61672E-07)</b>    |                                                                                                                                                                                                                                                                                                                                                               |
| <b>Genes Down-regulated</b>                        | <b>Genes Up-regulated</b>                                                                                                                                                                                                                                                                                                                                     |
|                                                    | COLEC12, COLEC11, ITGAM, ITGB5, NCF1, C1R, NCF2, ITGB3, NCF4, ITGB2, TCIRG1, CORO1A, THBS1, CTSS, C3, MRC2, TUBA1C, TUBA1B, TUBB6, HLA-DMA, FCGR3A, HLA-DMB, CLEC7A, MRC1, OLR1, CD14, FCGR1A, HLA-DOA, HLA-DQA2, HLA-DQA1, HLA-DPA1, MSR1, ATP6V0B, HLA-DRB5, ITGA2, CYBA, HLA-G, FCGR2A, HLA-DPB1, HLA-DRA, FCGR2B, FCGR2C, HLA-DRB1, HLA-DQB1, TLR2, VAMP3 |
| <b>Motor protein (p-adjusted value 5.3829E-04)</b> |                                                                                                                                                                                                                                                                                                                                                               |
| <b>Genes Down-regulated</b>                        | <b>Genes Up-regulated</b>                                                                                                                                                                                                                                                                                                                                     |
| KIF13A, KIF21B, MYO7B, MYO3B, KIF26B, MYH6, MYH7   | ACAA2, DNAH5, DNAH6, DNAH9, KIF17, MYL12A, DNALI1, MYH11, DNAH11, DYNLT3, KIF23, MYO7A, MYO1D, CENPE, KIF18A, KIF16B, MYO5B, MYO3A, MYO5C, DYNLRB2, KIF2C, MYL9, MYO1F, MYO1G                                                                                                                                                                                 |

**Supplementary Table S4.** Genes and pathways identified with increased glioma grade and TMEM230 upregulation. TMEM230 promoted Golgi complex dependent upregulation of glycoproteins and angiogenesis in highly vascularized infiltrating gliomas. Expression analysis correlated all genes differentially expressed with up-regulation of TMEM230 (p adjusted value of < or = 0.05, Supplementary Table 1). Gene Ontology and biological pathways were assessed using the False Discovery Rate method as shown.

|                                                                                                                                                                                                                                                                                                                                                                                                                                                                                                                                                                                                                                                                                                                                                                                                                                                             |                                                                                                                                                                                                                                                                                                                                                                                                                                                                                                                                                                                                                                                                                                                                                                                                                                                                                                                                                                                                                                                                                                                                                                                                                                                                                                                                                                                                                                                                                                                                                                                                                                                                                                                                                                                                                                                                                                                                                                                                                                                                                                                                                                                                                                                                                                                                                                                                                                                                                                                                                                                                                                                                                                                                                                                                                                                                                                                                                         |
|-------------------------------------------------------------------------------------------------------------------------------------------------------------------------------------------------------------------------------------------------------------------------------------------------------------------------------------------------------------------------------------------------------------------------------------------------------------------------------------------------------------------------------------------------------------------------------------------------------------------------------------------------------------------------------------------------------------------------------------------------------------------------------------------------------------------------------------------------------------|---------------------------------------------------------------------------------------------------------------------------------------------------------------------------------------------------------------------------------------------------------------------------------------------------------------------------------------------------------------------------------------------------------------------------------------------------------------------------------------------------------------------------------------------------------------------------------------------------------------------------------------------------------------------------------------------------------------------------------------------------------------------------------------------------------------------------------------------------------------------------------------------------------------------------------------------------------------------------------------------------------------------------------------------------------------------------------------------------------------------------------------------------------------------------------------------------------------------------------------------------------------------------------------------------------------------------------------------------------------------------------------------------------------------------------------------------------------------------------------------------------------------------------------------------------------------------------------------------------------------------------------------------------------------------------------------------------------------------------------------------------------------------------------------------------------------------------------------------------------------------------------------------------------------------------------------------------------------------------------------------------------------------------------------------------------------------------------------------------------------------------------------------------------------------------------------------------------------------------------------------------------------------------------------------------------------------------------------------------------------------------------------------------------------------------------------------------------------------------------------------------------------------------------------------------------------------------------------------------------------------------------------------------------------------------------------------------------------------------------------------------------------------------------------------------------------------------------------------------------------------------------------------------------------------------------------------------|
| <b>Glycoproteins and angiogenesis associated genes modulated in ODG with TMEM230-high vs TMEM230-low</b>                                                                                                                                                                                                                                                                                                                                                                                                                                                                                                                                                                                                                                                                                                                                                    |                                                                                                                                                                                                                                                                                                                                                                                                                                                                                                                                                                                                                                                                                                                                                                                                                                                                                                                                                                                                                                                                                                                                                                                                                                                                                                                                                                                                                                                                                                                                                                                                                                                                                                                                                                                                                                                                                                                                                                                                                                                                                                                                                                                                                                                                                                                                                                                                                                                                                                                                                                                                                                                                                                                                                                                                                                                                                                                                                         |
| <b>Glycoprotein (p-adjusted value 5.5377E-43)</b>                                                                                                                                                                                                                                                                                                                                                                                                                                                                                                                                                                                                                                                                                                                                                                                                           |                                                                                                                                                                                                                                                                                                                                                                                                                                                                                                                                                                                                                                                                                                                                                                                                                                                                                                                                                                                                                                                                                                                                                                                                                                                                                                                                                                                                                                                                                                                                                                                                                                                                                                                                                                                                                                                                                                                                                                                                                                                                                                                                                                                                                                                                                                                                                                                                                                                                                                                                                                                                                                                                                                                                                                                                                                                                                                                                                         |
| <b>Genes Down-regulated</b>                                                                                                                                                                                                                                                                                                                                                                                                                                                                                                                                                                                                                                                                                                                                                                                                                                 | <b>Genes Up-regulated</b>                                                                                                                                                                                                                                                                                                                                                                                                                                                                                                                                                                                                                                                                                                                                                                                                                                                                                                                                                                                                                                                                                                                                                                                                                                                                                                                                                                                                                                                                                                                                                                                                                                                                                                                                                                                                                                                                                                                                                                                                                                                                                                                                                                                                                                                                                                                                                                                                                                                                                                                                                                                                                                                                                                                                                                                                                                                                                                                               |
| XYLT1, GPR173, CREB3L4, CREB3L1, CHGB, FIBCD1, GPR161, CHST11, GALR1, FLRT1, PCDHA4, LRRC37A2, GPR17, BTBD17, GRIN3A, PCDHB2, GPR27, MAMDC4, AHSB, TET1, TMC3, MMP16, ANGPTL2, RGR, DSCAML1, GPR45, COL11A2, ADAM22, SEZ6, GLRA1, ADAM29, GCNT2, CSMD3, SLC17A8, GPR158, ZNF462, BCHE, SULF2, SLC8A3, SMOC1, SEMA5A, ITGA2B, TNF, SLC38A1, KCNH7, SLC9A3, LPAL2, CLEC4F, COL17A1, SLC26A1, SLC14A2, LRIT2, CSPG5, ALK, TSPAN11, AMH, ADAMTS6, GRID2, TRPC3, SEZ6L, NLGN3, SLC24A3, LRP4, PTPRZ1, CACNG2, CACNG4, P2RX3, MDGA2, KCNK3, THSD7A, SLC6A18, KCNK10, STC2, SCN3A, PCDH20, LRRN4, LRRN1, IGSF9B, GRIK2, ROBO1, KCNT2, CRTAC1, NOG, MST1, GFRA1, RGM, GABBR1, GALNT13, CELSR3, DSCAM, SHISA9, CACNA1A, WSCD1, INHBC, BMP2, MEGF11, LRRTM3, LRRTM4, MADCAM1, ABCC8, PCDHGA3, SSTR2, CDHR1, RGS17, LCAT, DLL1, ACAN, SLIT1, PCDHGC4, PCDHGC3, FAM155A | VIT, TMEM200B, COL12A1, MRGPRF, SLC4A2, SPINT2, F11R, GLDN, FGFR1, ISLR, LIPC, GPR171, C3AR1, BVES, IER3, SERPINF1, SERPINF2, RNASE6, RNASE3, RNASE2, RNASE1, DKK2, SIGIRR, SPINT1, GPR160, PLBD1, SERPING1, CFB, CFH, HPN, CFI, CLCNKB, FPR1, IL20RA, PDGFA, LYPD3, FPR2, LYPD6, C2, ADAMTS16, C3, ADAMTS14, C6, C7, PDGFD, SERPINH1, PROM1, HLA-DQA2, HLA-DQA1, C19ORF38, ST3GAL3, NGFR, HLA-DRB5, FZD2, JUP, FZD5, ABCA5, MCAM, FUCA1, ABCA4, FZD6, FUCA2, FZD9, FZD8, ABCA7, CP, COL1A1, COL1A2, SNAI1, TNFSF8, FXYD5, HLA-DRB1, RET, SERPINA3, SERPINA1, SIGLEC9, WFIKK2, VSIG10L, PRSS23, PHEX, ASGR2, SERPINA5, MRC2, GPR132, ADAMTSL4, ADAMTSL3, TCTN2, MRC1, CTLA4, OLR1, EMB, TIMP1, CTBS, HLA-DPA1, HAVCR2, CHST8, CHST6, CLUL1, GPR37, SLC2A10, NFAM1, MAMDC2, TMC8, EMP1, EMP3, F3, BACE2, CD200R1, COL2A1, GPRC5A, SLC7A7, ANGPTL7, TMEM106C, COL21A1, GAS6, HCST, HLA-DQB2, CHST2, HLA-DQB1, CRB2, GCNT1, PTAFR, FSTL1, PTGS1, HLA-DMA, ADAM28, HLA-DMB, SRPX2, FRZB, OLFML3, TMEM67, OLFML1, APOL1, IL12RB1, C11ORF45, RNF130, LEFTY2, LRRC25, EVC2, P2RY13, IL10RA, GPR55, ADAM33, GPR1, VWA3A, PRSS36, KIAA2013, SULF1, PLXDC2, TMEM156, COL3A1, GPR143, SLC03A1, RNF149, CLCF1, HLA-DPB1, C16ORF89, PLP2, CCDC3, FMOD, LGR6, CCL28, OLFML2B, CSF3R, GPR65, TNC, F13A1, PLOD1, EFEMP2, PODNL1, EFEMP1, ADORA3, LAMP3, CLEC5A, TNFRSF8, HLA-DOA, SLC39A4, IL13RA1, LAG3, COL27A1, IGFBP2, BSCL2, MFNG, ROR1, FKBP9, ROR2, DSC2, CHODL, CSF1R, CD274, KCNE1, KCNE3, GPR88, TACSTD2, LY96, TNFRSF11B, AEBP1, GPR84, TNFRSF11A, SLC9A1, CLEC7A, TNFRSF14, IGFBP6, SLC15A3, CD300LF, NPTX2, PLTP, CPA4, KL, CD163, SLC37A2, HTR1D, LY86, CYBRD1, LRRC66, IGSF10, PTPRC, P4HA3, ITGA11, OGN, HLA-DRA, CNTNAP3, KCNK5, MOXD1, ST6GALNAC2, ITGAM, ITGB5, COL14A1, ITGB4, ITGB3, ITGB2, LECT1, ECE1, TREM2, CPZ, ITGAL, MSLN, WISP1, TSPAN10, ADAMTS4, SPN, SCPEP1, FCGR3A, ADAMTS3, EMILIN3, EMILIN2, ITGB7, EMILIN1, TNFSF12-TNFSF13, ADAMTS7, SLC13A3, RNASET2, ITGA2, ADRA2C, TNFRSF1B, ADRA2A, ASPN, TNFRSF1A, NPC2, DSG2, MET, ST6GALNAC5, CEBPB, COL15A1, SEMA3C, C1S, FRRS1, C1R, UNC93B1, SEMA3A, FGL2, NTN5, SEMA3F, IL2RG, COCH, CECR1, CDC42, P2RY6, CCL5, P2RY2, CEACAM21, FCGR1A, FCGR1B, KCNJ1, CTHRC1, LINGO2, SEMA4D, ANGPT1, MBOAT7, GZMA, GZMH, MFAP5, MFAP4, FCGR2A, FRA51, CLEC2B, TSPAN19, APOC2, P2RX1, MFAP2, IL2RB, HCG22, CD248, PI16, EVI2B, FCGR2B, FOLR2, FOLR1, CBLN3, FCGR2C, CD244, SPON2, OXTR, PRF1, LDLRAD2, ICAM4, KLHDC7A, AQP5, IFI30, LCTL, AQP3, ICAM1, AQP1, C4A, NIPAL3, OXER1, EPHB2, SYNPO, ICOSLG, HABP2, SLC34A2, IL15RA, EPHA4, EPHA7, ACSL1, SLC6A16, IL1R1, SLC11A1, KCNK13, KRT8, TIMD4, HLA-G, GBT1, SFRP4, FNDC1, CD109, KCNQ1, CD226, CD101, CES1, SLC45A2, SDC4, IGSF3, GYPC, SDC2, IGSF1, GYPE, EBI3, LPAR1, TMTC2, CD79B, CD79A, CD19, ST8SIA4, ARSI, SLAMF6, TSPAN2, TRPM8, CD14, APOB, SLAMF1, CCR1, NTNG1, SIGLEC16, MSR1, SIGLEC14, SIGLEC11, TNFSF13, SIGLEC10, IGF2, GDF5, VASN, |

|                                                                      |                                                                                                                                                                                                                                                                                                                                                                                                                                                                                                                                                                                                                                                                                                                                                                                                                                                                                                                                                                                                                                                                                                                                                                                                                                                                                                                                                                                                                                                                                                                                                                                                                                                                                                                              |
|----------------------------------------------------------------------|------------------------------------------------------------------------------------------------------------------------------------------------------------------------------------------------------------------------------------------------------------------------------------------------------------------------------------------------------------------------------------------------------------------------------------------------------------------------------------------------------------------------------------------------------------------------------------------------------------------------------------------------------------------------------------------------------------------------------------------------------------------------------------------------------------------------------------------------------------------------------------------------------------------------------------------------------------------------------------------------------------------------------------------------------------------------------------------------------------------------------------------------------------------------------------------------------------------------------------------------------------------------------------------------------------------------------------------------------------------------------------------------------------------------------------------------------------------------------------------------------------------------------------------------------------------------------------------------------------------------------------------------------------------------------------------------------------------------------|
|                                                                      | BST2, BST1, TG, LPAR5, ARTN, LPAR6, SDC1, PTPRU, COL18A1, CD40, SLC44A3, ECM2, CTSZ, SECTM1, CTSW, GRIK1, CD3D, WFDC2, CTSS, PTPRF, UCHL1, ESM1, SLC22A15, STAB1, RAC2, CTSH, CD37, CCR5, CTSC, CD33, CCR2, IL10, CD53, CD52, IL15, ANO9, ANO6, MMEL1, PDCD1LG2, HBA1, RHOC, GFRA3, OSMR, GFRA2, TLR1, CEACAM1, B3GNT8, CDCP1, NOV, B3GNT7, B3GNT5, TLR8, VWA1, B3GNT2, RDH5, TLR7, CD302, TLR5, CD44, MATN2, TLR2, PTGER4, C1QB, C1QA, SELPLG, TNXB, TMPRSS3, PTGER2, PTGER3, AMIGO2, GDPD2, CXCR6, CST7, LILRA2, RELN, CXCR3, PDPN, KISS1R, GPC3, SUSD3, GPC4, CD58, GABRE, CD55, LAIR1, MICB, MPZL2, CD74, CD72, GDF15, SUSD2, DKKL1, OSM, LILRB1, LILRB2, XG, KRT18, FAP, QPCT, CACHD1, F2RL1, CD69, CD68, F2RL2, C1QC, CD86, FCGBP, STEAP3, CD83, HFE, SIRPG, NPY2R, MPL, CLEC18C, LOXL4, CLEC18B, PLAT, CELSR1, CLEC18A, PLB1, PLAUI, SIT1, C1RL, FAM3B, ENPP1, PRND, CD96, POSTN, CD300A, HGF, APLP1, CYBB, PCOLCE, ATP1B1, PDGFRL, OSCAR, LOX, SCNN1A, ADAM12, COL4A6, COL4A5, CD300C, KLRB1, C5AR1, CHRNA9, FBLN1, CSF2RB, LTBP2, SLC1A5, CACNA1F, FBLN2, NID2, CSF2RA, EFNA4, LTBP1, PLD3, FBLN5, DPP4, EFN2, CACNA1S, WNT2, WNT4, C16ORF54, TGFB2, OPN3, VCAM1, TGFB1, PTCH2, CRTAM, TRPV2, CLEC17A, EPHX3, KIF18A, PROC, COL5A2, TMEM119, FGFR3, ULBP1, ULBP3, WNT2B, B4GALT1, MEGF10, TNFAIP6, SIRPB2, SLC2A5, DMKN, HS2ST1, BDKRB2, MAN1A1, CA9, SCN5A, SRGN, ABCC3, EGFL6, PLAUR, WNT16, MMP9, TGFB3, GREM1, RCN3, OAS2, COL6A2, TMEM217, CHI3L2, CASQ2, CHI3L1, COL6A3, LTB, LTF, COLEC12, HIST1H2BJ, LAMA2, TM2D1, LAMA4, HIST1H2BK, TFPI, THBS1, KDELC2, MAN1C1, SCN7A, LRIG3, SLIT3, S1PR3, CHSY3, TAS1R1, GALNT4, GALNT3, LGI4, EGF, LUM, LAMB1, SOD3, HS3ST1, CD2, CD4, CD6, CD5, CD7, PMP22, VIM, LTBR |
| <b>Angiogenesis associated genes (p-adjusted value 5.273066E-03)</b> |                                                                                                                                                                                                                                                                                                                                                                                                                                                                                                                                                                                                                                                                                                                                                                                                                                                                                                                                                                                                                                                                                                                                                                                                                                                                                                                                                                                                                                                                                                                                                                                                                                                                                                                              |
| <b>Genes Down-regulated</b>                                          | <b>Genes UP-regulated</b>                                                                                                                                                                                                                                                                                                                                                                                                                                                                                                                                                                                                                                                                                                                                                                                                                                                                                                                                                                                                                                                                                                                                                                                                                                                                                                                                                                                                                                                                                                                                                                                                                                                                                                    |
| HEY1, THSD7A                                                         | COL18A1, COL15A1, SH2D2A, PDGFA, FGF1, HOXB13, MEOX2, PIK3CG, TYMP, ESM1, SRPX2, GJA5, CXCR3, HOXA3, PROK2, CYP1B1, PTK2B, HMOX1, TNFSF12-TNFSF13, EPHB2, HOXA7, HTATIP2, VAV3, TGFB2, JUN, TNFRSF12A, SYK, ANGPT1, ANXA2, FZD5, EGF, MCAM, IL18, FZD8, MMP14, CEACAM1, KLF5, FAP, NOV, ADM2, COL8A2, HOXB3, COL8A1, ANG                                                                                                                                                                                                                                                                                                                                                                                                                                                                                                                                                                                                                                                                                                                                                                                                                                                                                                                                                                                                                                                                                                                                                                                                                                                                                                                                                                                                     |

**Supplementary Table S5.** Most significant glycoproteins and angiogenesis associated genes in ODG with TMEM230 upregulation. Genes were selected based on an adjusted P-value ( $< 1,00E-05$ ) and an absolute log<sub>2</sub> fold change of  $> 2$ .

| OLIGODENDROGLIOMA                             |                                  |                          |
|-----------------------------------------------|----------------------------------|--------------------------|
| Glycoproteins (p-adjusted value 5.54E-43)     |                                  |                          |
| Down-regulated in TMEM230 high vs TMEM230 low |                                  |                          |
| Gene name                                     | log <sub>2</sub> FoldChange $>2$ | padj $<1,00E-05$         |
| TMC3                                          | -2,503399205 <sup>1</sup>        | 4,71168E-08 <sup>2</sup> |
| Up-regulated in TMEM230 high vs TMEM230 low   |                                  |                          |
| Gene name                                     | log <sub>2</sub> FoldChange $>2$ | padj $<1,00E-05$         |
| ABCC3                                         | 2,426369431                      | 1,53651E-15              |
| ANO9                                          | 2,136173506                      | 4,68867E-05              |
| CD2                                           | 2,118803466                      | 2,18233E-12              |
| CD3D                                          | 2,479285615                      | 8,23728E-08              |
| CELSR1                                        | 2,258563899                      | 7,53705E-21              |
| COL2A1                                        | 2,085797221                      | 1,12395E-06              |
| CXCR6                                         | 2,106246226                      | 1,29299E-09              |
| C6                                            | 3,460983598                      | 4,75713E-09              |
| CHI3L1                                        | 4,259222655                      | 1,60513E-39              |
| CHI3L2                                        | 2,16443761                       | 7,55398E-15              |
| EMILIN3                                       | 2,552719902                      | 2,2874E-13               |
| EVC2                                          | 2,190079011                      | 4,52538E-17              |
| GPR1                                          | 2,324815684                      | 2,88324E-05              |
| GPRC5A                                        | 2,030586314                      | 1,65161E-12              |
| GZMA                                          | 2,113054151                      | 6,88925E-11              |
| IGFBP2                                        | 2,313066319                      | 2,7526E-17               |
| KLRB1                                         | 2,011507458                      | 1,37078E-06              |
| KISS1R                                        | 2,130302848                      | 1,13059E-05              |
| LECT1                                         | 2,073242774                      | 3,52722E-10              |
| MMP9                                          | 2,373232832                      | 5,48088E-10              |
| MMEL1                                         | 3,599237766                      | 1,87916E-14              |
| MOXD1                                         | 3,25804939                       | 1,3944E-23               |
| POSTN                                         | 2,832912181                      | 1,06319E-11              |
| ROR2                                          | 2,225722267                      | 3,63308E-18              |
| SIT1                                          | 2,528683236                      | 4,56323E-09              |

|                                                                   |                            |                         |
|-------------------------------------------------------------------|----------------------------|-------------------------|
| SLC34A2                                                           | 3,015907839                | 3,09943E-13             |
| TSPAN19                                                           | 2,518618103                | 1,78963E-06             |
| ULBP1                                                             | 2,213250722                | 3,9782E-11              |
| XG                                                                | 2,206443316                | 2,10978E-05             |
| <b>Angiogenesis associated genes (p-adjusted value 5.273E-03)</b> |                            |                         |
| <b>Down-regulated in TMEM230 high vs TMEM230 low</b>              |                            |                         |
| <b>Gene name</b>                                                  | <b>log2FoldChange&gt;2</b> | <b>padj&lt;1,00E-05</b> |
| TMC3                                                              | -2,503399205               | 4,71168E-08             |
| <b>Up-regulated in TMEM230 high vs TMEM230 low</b>                |                            |                         |
| <b>Gene name</b>                                                  | <b>log2FoldChange&gt;2</b> | <b>padj&lt;1,00E-05</b> |
| HOXA3                                                             | 4,342084814                | 4,16713E-05             |
| HOXA7                                                             | 7,695907211                | 1,02553E-22             |
| HOXB3                                                             | 4,284650669                | 2,64264E-24             |
| HOXB13                                                            | 3,743738029                | 4,55944E-06             |
| CXCR3                                                             | 2,54484793                 | 4,18208E-08             |
| COL8A1                                                            | 2,465517007                | 4,97546E-16             |

**Supplementary Table S6.** Comparison of Fold change and p adjusted (padj) value in expression of glycoproteins and angiogenesis associated genes in ODG or GBM with TMEM230 upregulation. Selected genes (Supplementary Table 1) identified in ODG (with an adjusted P-value (< 1.00E-05) and an absolute log2 fold change of > 2) were compared to genes in patients of GBM.

| ODG                                           |               |             |  | GBM       |                  |                |
|-----------------------------------------------|---------------|-------------|--|-----------|------------------|----------------|
| Glycoproteins                                 |               |             |  |           |                  |                |
| Down-regulated in TMEM230 high vs TMEM230 low |               |             |  |           |                  |                |
| Gene name                                     | log2FC        | padj        |  | Gene name | log2FC           | padj           |
| TMC3                                          | - 2,503399205 | 4,71168E-08 |  | TMC3      | 0.53180330413885 | 0.062056137752 |
| Up-regulated in TMEM230 high vs TMEM230 low   |               |             |  |           |                  |                |
| Gene name                                     | log2FC        | padj        |  | Gene name | log2FC           | padj           |
| ABCC3                                         | 2,426369431   | 1,53651E-15 |  | ABCC3     | 0.0212250366     | 0.95055705     |
| ANO9                                          | 2,136173506   | 4,68867E-05 |  | ANO9      | 0.0689326870     | 0.90078775     |
| CD2                                           | 2,118803466   | 2,18233E-12 |  | CD2       | 0.6315172698     | 0.01887520     |
| CD3D                                          | 2,479285615   | 8,23728E-08 |  | CD3D      | 0.9245315466     | 0.00235036     |
| CELSR1                                        | 2,258563899   | 7,53705E-21 |  | CELSR1    | 0.3540866600     | 0.22458230     |
| COL2A1                                        | 2,085797221   | 1,12395E-06 |  | COL2A1    | 1.1396620861     | 0.00298383     |
| CXCR6                                         | 2,106246226   | 1,29299E-09 |  | CXCR6     | 0.5807445409     | 0.050250776    |
| C6                                            | 3,460983598   | 4,75713E-09 |  | C6        | 0.8509950950     | 0.22063700     |
| CHI3L1                                        | 4,259222655   | 1,60513E-39 |  | CHI3L1    | 0.8561575969     | 0.02064791     |
| CHI3L2                                        | 2,16443761    | 7,55398E-15 |  | CHI3L2    | 1.05442912647    | 0.000361115    |
| EMILIN3                                       | 2,552719902   | 2,2874E-13  |  | EMILIN3   | 0.2712692642     | 0.403328296    |
| EVC2                                          | 2,190079011   | 4,52538E-17 |  | EVC2      | 0.2283639486     | 0.333497337    |
| GPR1                                          | 2,324815684   | 2,88324E-05 |  | GPR1      | 0.3253671064     | 0.536369244    |
| GPRC5A                                        | 2,030586314   | 1,65161E-12 |  | GPRC5A    | 0.2743910284     | 0.325367106    |
| GZMA                                          | 2,113054151   | 6,88925E-11 |  | GZMA      | 1.0158684935     | 0.000248458    |
| IGFBP2                                        | 2,313066319   | 2,7526E-17  |  | IGFBP2    | 0.2835995101     | 0.178020221    |
| KLRB1                                         | 2,011507458   | 1,37078E-06 |  | KLRB1     | 1.0200424914     | 0.002878009    |
| KISS1R                                        | 2,130302848   | 1,13059E-05 |  | KISS1R    | 0.9653430216     | 0.011640480    |
| LECT1                                         | 2,073242774   | 3,52722E-10 |  | LECT1     | 0.7316018867     | 0.056214765    |
| MMP9                                          | 2,373232832   | 5,48088E-10 |  | MMP9      | 0.02715222150    | 0.945520879    |
| MMEL1                                         | 3,599237766   | 1,87916E-14 |  | MMEL1     | 0.02666021019    | 0.945720074    |
| MOXD1                                         | 3,25804939    | 1,3944E-23  |  | MOXD1     | 0.23970001577    | 0.4587874404   |
| POSTN                                         | 2,832912181   | 1,06319E-11 |  | POSTN     | 0.14296033062    | 0.7780729943   |
| ROR2                                          | 2,225722267   | 3,63308E-18 |  | ROR2      | 0.50190385756    | 0.1187631094   |
| SIT1                                          | 2,528683236   | 4,56323E-09 |  | SIT1      | 0.85398179670    | 0.0019311724   |
| SLC34A2                                       | 3,015907839   | 3,09943E-13 |  | SLC34A2   | 0.04322631485    | 0.9107578019   |
| TSPAN19                                       | 2,518618103   | 1,78963E-06 |  | TSPAN19   | 2.51861810275    | 0.0001599702   |
| ULBP1                                         | 2,213250722   | 3,9782E-11  |  | ULBP1     | 0.36480094343    | 0.2952411726   |
| XG                                            | 2,206443316   | 2,10978E-05 |  | XG        | 0.37998125594    | 0.3303205836   |
| Angiogenesis associated genes                 |               |             |  |           |                  |                |
| Down-regulated in TMEM230 high vs TMEM230 low |               |             |  |           |                  |                |
| Gene name                                     | log2FC        | padj        |  | Gene name | log2FC           | padj           |
| TMC3                                          | - 2 503399205 | 4 71168E-08 |  | TMC3      | 0 53180330413    | 0 06205613775  |

| Up-regulated in TMEM230 high vs TMEM230 low |             |             |  |           |                |              |
|---------------------------------------------|-------------|-------------|--|-----------|----------------|--------------|
| Gene name                                   | log2FC      | padj        |  | Gene name | log2FC         | padj         |
| HOXA3                                       | 4,342084814 | 4,16713E-05 |  | HOXA3     | 0.37793180116  | 0.2205294254 |
| HOXA7                                       | 7,695907211 | 1,02553E-22 |  | HOXA7     | 0.52021719543  | 0.1257013868 |
| HOXB3                                       | 4,284650669 | 2,64264E-24 |  | HOXB3     | 0.14590526890  | 0.6926876030 |
| HOXB13                                      | 3,743738029 | 4,55944E-06 |  | HOXB13    | 0.832649867786 | 0.1274102550 |
| CXCR3                                       | 2,54484793  | 4,18208E-08 |  | CXCR3     | 0.412711030037 | 0.2268469735 |
| COL8A1                                      | 2,465517007 | 4,97546E-16 |  | COL8A1    | 0.157209866058 | 0.6836562148 |

**Supplementary Table S7. Glycoproteins and angiogenesis gene expression are elevated in GBM compared ODG.** Base mean expression of glycoprotein and angiogenesis associated genes in high-grade oligodendroglioma and GBM with high expression of TMEM230 with P value < or = to 0.05.

| ODG                |                   | GBM       |                     |
|--------------------|-------------------|-----------|---------------------|
| Glycoproteins      |                   |           |                     |
| Gene name          | baseMean          | Gene name | baseMean            |
| ABCC3              | 45.0683380176947  | ABCC3     | 1444.03706547031    |
| ANO9               | 0.735428106141748 | ANO9      | 2.06291727570392    |
| CD2                | 9.70675142915889  | CD2       | 54.6693306121704    |
| CD3D               | 3.31277664846862  | CD3D      | 22.6200940544139    |
| CELSR1             | 49.2732791098697  | CELSR1    | 310.201.181.467.494 |
| COL2A1             | 44.0569691986772  | COL2A1    | 1108.10448213783    |
| CXCR6              | 3.95329276712741  | CXCR6     | 22.0912783463787    |
| C6                 | 2.33767090315604  | C6        | 7.46114605159741    |
| CHI3L1             | 2215.66437763646  | CHI3L1    | 94488.2736314881    |
| CHI3L2             | 353.13343598619   | CHI3L2    | 7663.53239764535    |
| EMILIN3            | 192.344655599255  | EMILIN3   | 1018.87407884725    |
| EVC2               | 16.2718066760163  | EVC2      | 99.102.443.919.267  |
| GPR1               | 2.51686109940378  | GPR1      | 43.6084139941885    |
| GPRC5A             | 16.742289004299   | GPRC5A    | 136.543850100943    |
| GZMA               | 6.95484889286462  | GZMA      | 38.3824819388928    |
| IGFBP2             | 951.71535409566   | IGFBP2    | 11055.1760938473    |
| KLRB1              | 2.59473692383721  | KLRB1     | 11.5174512260351    |
| KISS1R             | 2.92735554773466  | KISS1R    | 26.7114854318749    |
| LECT1              | 11.7334609101467  | LECT1     | 43.2152881751178    |
| MMP9               | 41.4173790666884  | MMP9      | 1082.94127099192    |
| MMEL1              | 7.1979931723461   | MMEL1     | 29.096.665.053.022  |
| MOXD1              | 198.507960260697  | MOXD1     | 1689.29149295905    |
| POSTN              | 31.108628167365   | POSTN     | 4883.03932459562    |
| ROR2               | 17.5302156073053  | ROR2      | 63.6565646911659    |
| SIT1               | 1.74217057465497  | SIT1      | 11.5372923448428    |
| SLC34A2            | 6.150389492759    | SLC34A2   | 61.539.409.311.072  |
| TSPAN19            | 1.07070368104308  | TSPAN19   | 1.48204534564531    |
| ULBP1              | 6.01723862239876  | ULBP1     | 38.238313892902     |
| XG                 | 1.59773272868553  | XG        | 6.14828199501641    |
| Angiogenesis genes |                   |           |                     |
| Gene name          | baseMean          | Gene name | baseMean            |
| HOXA3              | 8.56032761824698  | HOXA3     | 115.686704979465    |
| HOXA7              | 27.0949336848246  | HOXA7     | 343.631701587873    |
| HOXB3              | 16.7324138948787  | HOXB3     | 302.743789089478    |
| HOXB13             | 5.24727219896883  | HOXB13    | 83.7034211445756    |
| CXCR3              | 2.14863192983004  | CXCR3     | 11.381496231888     |
| COL8A1             | 26.60804657927    | COL8A1    | 353.645518719561    |

**Supplementary Table S8.** Genes and pathways identified with increased glioma grade and TMEM230 upregulation in patients with astrocytoma. TMEM230 regulates components of endomembrane system associated with cargo trafficking and secretion: Golgi complex and endoplasmic reticulum dependent

as identified in ODG. Expression analysis correlated all genes differentially expressed with up-regulation of TMEM230 (p adjusted value of  $\leq 0.05$ , Supplementary Table 1). Gene Ontology and biological pathways were assessed using the False Discovery Rate.

| Endomembrane system genes modulated in ASTROCYTOMA<br>with TMEM230-high vs TMEM230-low                                                                                                                                                                                                                                                                                                                                                                                                                                                                                                                                                                                                                                                                                                                                                                                                                                                                                                                                                                                                                                                                                                                                                                                                                                                                                                                                                                                                                                                                                                                                                                                                                                                                                                                                        |                                                                                                                                                                                                                                                                                                                                                                                                                                                                                                                                                                                                                                                                                                                                                                                                                                                                                                                                                                                                                                                                                                                                                                                                                                                                                                                                                                                                                                                                                                                                                                                                                                                                                                                                                                                                                                                                                                                                                                                                                                                                                                                                                                                                                                                                                                                                                                                                                                                                                                                                                                                                                                                                                                                                                                                                                                                                                                                                                                                                                                                                                                                                                                                                                                                                                                                                                                                                                                                                                                                                                                                                                                                                                                                                                                                                                                                                                                                                                                                                                                                                                                                                                                                                                                                                                                                                                                                                                                                                                                                                                                                                                                                                                                                                                                                                                                                                                                                                                                                                                                                                                                                                                                                                                                                                                                                                                                                                                                                 |
|-------------------------------------------------------------------------------------------------------------------------------------------------------------------------------------------------------------------------------------------------------------------------------------------------------------------------------------------------------------------------------------------------------------------------------------------------------------------------------------------------------------------------------------------------------------------------------------------------------------------------------------------------------------------------------------------------------------------------------------------------------------------------------------------------------------------------------------------------------------------------------------------------------------------------------------------------------------------------------------------------------------------------------------------------------------------------------------------------------------------------------------------------------------------------------------------------------------------------------------------------------------------------------------------------------------------------------------------------------------------------------------------------------------------------------------------------------------------------------------------------------------------------------------------------------------------------------------------------------------------------------------------------------------------------------------------------------------------------------------------------------------------------------------------------------------------------------|-------------------------------------------------------------------------------------------------------------------------------------------------------------------------------------------------------------------------------------------------------------------------------------------------------------------------------------------------------------------------------------------------------------------------------------------------------------------------------------------------------------------------------------------------------------------------------------------------------------------------------------------------------------------------------------------------------------------------------------------------------------------------------------------------------------------------------------------------------------------------------------------------------------------------------------------------------------------------------------------------------------------------------------------------------------------------------------------------------------------------------------------------------------------------------------------------------------------------------------------------------------------------------------------------------------------------------------------------------------------------------------------------------------------------------------------------------------------------------------------------------------------------------------------------------------------------------------------------------------------------------------------------------------------------------------------------------------------------------------------------------------------------------------------------------------------------------------------------------------------------------------------------------------------------------------------------------------------------------------------------------------------------------------------------------------------------------------------------------------------------------------------------------------------------------------------------------------------------------------------------------------------------------------------------------------------------------------------------------------------------------------------------------------------------------------------------------------------------------------------------------------------------------------------------------------------------------------------------------------------------------------------------------------------------------------------------------------------------------------------------------------------------------------------------------------------------------------------------------------------------------------------------------------------------------------------------------------------------------------------------------------------------------------------------------------------------------------------------------------------------------------------------------------------------------------------------------------------------------------------------------------------------------------------------------------------------------------------------------------------------------------------------------------------------------------------------------------------------------------------------------------------------------------------------------------------------------------------------------------------------------------------------------------------------------------------------------------------------------------------------------------------------------------------------------------------------------------------------------------------------------------------------------------------------------------------------------------------------------------------------------------------------------------------------------------------------------------------------------------------------------------------------------------------------------------------------------------------------------------------------------------------------------------------------------------------------------------------------------------------------------------------------------------------------------------------------------------------------------------------------------------------------------------------------------------------------------------------------------------------------------------------------------------------------------------------------------------------------------------------------------------------------------------------------------------------------------------------------------------------------------------------------------------------------------------------------------------------------------------------------------------------------------------------------------------------------------------------------------------------------------------------------------------------------------------------------------------------------------------------------------------------------------------------------------------------------------------------------------------------------------------------------------------------------------------------------|
| Glycosylation site:N-linked (p-adjusted value 1.35531E-64)                                                                                                                                                                                                                                                                                                                                                                                                                                                                                                                                                                                                                                                                                                                                                                                                                                                                                                                                                                                                                                                                                                                                                                                                                                                                                                                                                                                                                                                                                                                                                                                                                                                                                                                                                                    |                                                                                                                                                                                                                                                                                                                                                                                                                                                                                                                                                                                                                                                                                                                                                                                                                                                                                                                                                                                                                                                                                                                                                                                                                                                                                                                                                                                                                                                                                                                                                                                                                                                                                                                                                                                                                                                                                                                                                                                                                                                                                                                                                                                                                                                                                                                                                                                                                                                                                                                                                                                                                                                                                                                                                                                                                                                                                                                                                                                                                                                                                                                                                                                                                                                                                                                                                                                                                                                                                                                                                                                                                                                                                                                                                                                                                                                                                                                                                                                                                                                                                                                                                                                                                                                                                                                                                                                                                                                                                                                                                                                                                                                                                                                                                                                                                                                                                                                                                                                                                                                                                                                                                                                                                                                                                                                                                                                                                                                 |
| Genes Down-regulated                                                                                                                                                                                                                                                                                                                                                                                                                                                                                                                                                                                                                                                                                                                                                                                                                                                                                                                                                                                                                                                                                                                                                                                                                                                                                                                                                                                                                                                                                                                                                                                                                                                                                                                                                                                                          | Genes Up-regulated                                                                                                                                                                                                                                                                                                                                                                                                                                                                                                                                                                                                                                                                                                                                                                                                                                                                                                                                                                                                                                                                                                                                                                                                                                                                                                                                                                                                                                                                                                                                                                                                                                                                                                                                                                                                                                                                                                                                                                                                                                                                                                                                                                                                                                                                                                                                                                                                                                                                                                                                                                                                                                                                                                                                                                                                                                                                                                                                                                                                                                                                                                                                                                                                                                                                                                                                                                                                                                                                                                                                                                                                                                                                                                                                                                                                                                                                                                                                                                                                                                                                                                                                                                                                                                                                                                                                                                                                                                                                                                                                                                                                                                                                                                                                                                                                                                                                                                                                                                                                                                                                                                                                                                                                                                                                                                                                                                                                                              |
| NDST4, IGLON5, UNC5A, CACNA2D3, CACNA2D2, ADAMTS19, PRRT2, BTBD17, CADM2, GRIN3A, STRC, WFIKKN1, KCNC1, GPR21, TMEFF2, CHST1, DSCAML1, GPR45, ADAM29, GLRA3, CSMD3, CSMD2, CSMD1, WNT7B, GLRA4, LGR5, UPK2, GPR61, KCNH3, SLC9A2, OLFM1, SLC9A5, IGFALS, NPPTX, GRIA2, NPPTX, GRIA3, GRIA4, G6PC2, LRIT2, SPRN, KCNK7, ELFN2, OVGP1, GRID2, SEZ6L, ADAMTS20, IL1RAPL1, LRTM2, NTN4, SLC5A12, SLITRK5, LINGO1, PCDH7, MDGA2, KCNK3, KCNK4, SPON1, ICA5, BSN, EPHB1, SCN1A, ISLR2, EPHA10, PCDH15, MST1R, SCN3B, SCN3A, NTNG2, PCDH20, LRRN4, ST8SIA3, SCN2A, PTPRT, PTPRR, GRIK2, KCNT1, CRTAC1, MME, SLC32A1, MST1, SYP, SORCS3, SYN1, GABBR1, GRIN1, CELSR3, ADAM11, LMTK3, SCN8A, SLC1A1, CACNA1B, CACNA1A, SLC1A4, SLC1A6, CACNA1H, FUT3, FUT6, FUT5, KCNV2, FUT9, SYT2, FGF17, BMP2, CNTN3, GRM4, GALNT9, SSTR1, SSTR2, SSTR5, VCAN, CDHR1, CDHR5, INA, SHANK2, PRTG, SLIT1, CHGA, ACVR2B, FAM155A, COL7A1, GPR173, MYC, GPR179, CHGB, BCAN, GPLD1, PHYHIPL, FAM171A2, GALR3, FLRT1, PCDHA5, PROM2, WNT10B, SSPO, GALNTL6, GABRB3, MRC1, RSP03, RNF150, SLC2A13, TET1, TMEM179, ANGPTL2, RGR, RNF165, RPRM, AOC2, GABRA5, GABRA3, PRSS35, SULF2, SMOG1, CHRM1, CHRM4, EPX, SLC8A2, CDH7, FGF9, TNF, SEMA6B, SLC15A2, RTN4R, SLC26A1, KIAA1644, DRD2, DRD5, CSPG5, SERINC5, AMH, SGCG, RTN4RL2, VSTM2A, NLGN2, LUZP2, MGAT5B, CACNG2, ANGPT4, SEMA4A, SEMA4B, SEMA4G, GLRB, CBLN2, CBLN1, VIPR1, VIPR2, EYS, CRHR1, SNAP91, IZUMO1, NOG, GFRA1, GP1BA, CCKBR, MAPT, GABRD, CA11, LYVE1, LY6G5B, GALNT13, FAIM2, TMEM145, CHRN2, DSCAM, PRSS55, SHISA7, SCG3, CHRNA4, LPL, HRH3, CDH20, CDH22, KLRC3, PTCH1, LRP1B, EFNA3, EFNA2, NMUR2, GLP1R, MEGF11, HAPLN1, LRRTM3, LRRTM4, LRRTM1, LRRTM2, TAS2R5, TAS2R4, PCDHGA6, ABCC8, PCDHGA3, OR2H2, PCDHGA1, CDH10, CDH13, CDH18, HCN3, NRXN1, NRXN2, DLL1, LRIG1, OPCML, NEGR1 | ADAMDEC1, TFRC, F11R, IL4I1, ISLR, LIPC, C3AR1, VSTM1, RNASE6, RNASE3, RNASE2, HSPG2, SPINT1, AGTR1, PLBD1, HS3ST3A1, ABCB4, FPR1, IL20RA, CLCNKB, PDGFA, FPR3, FPR2, C2, C3, ADAMTS14, C6, C7, KCNMB1, C19ORF38, NGFR, HLA-DRB5, ABCA5, FUCA1, APCDD1L, FUCA2, FN1, CP, COL1A1, IL22RA1, COL1A2, DCHS2, NOX4, GPR18, HLA-DRB1, PIGT, SIGLEC9, HEXB, LRRC32, OLR1, CTLA4, CTBS, HLA-DPA1, IKBIP, GPR39, CHST6, GPR37, BGN, EMP2, EMP3, F3, SUMF1, PIGB, GPRC5A, SLC7A7, TLR10, CHST2, CRB2, LRRC15, PTAFR, CLECL1, ABCB11, FSTL1, EGFR, SLC7A3, PTGS1, HLA-DMA, HLA-DMB, FRZB, GPA33, TMEM67, SPP1, C11ORF45, IL12RB1, LRRC25, EVC2, P2RY10, GPR55, ADAM33, VWA3A, PLXDC2, DCBLD2, LRIG1, SLC03A1, HLA-DPB1, SIGLEC1, LGR6, SIGLEC7, SIGLEC5, OLFML2B, GPR65, HP, LY75, F13A1, PLOD3, IL1RAP, EFEMP2, EFEMP1, IBSP, ADORA3, ADORA1, HLA-DOA, HLA-DOB, TNFRSF4, TICAM2, TPST1, NAAA, ROR1, ROR2, PLA2R1, DSC2, CHODL, CD274, KCNE1, KCNE3, KCNE4, TACSTD2, LY96, TNFRSF11B, GPR84, GPR82, TMEM26, TNFRSF14, CPA4, CD276, TFP12, B3GALT4, LY86, LRRC66, TMEM17, PTPRC, OGN, HLA-DRA, KCNK5, ITGB1, MOXD1, ST6GALNAC2, ITGB4, ITGB3, ITGB2, LECT1, FASLG, ECE1, ITGAL, WISPI, TNFSF13B, SPN, FCGR3A, FCGR3B, ITGB8, ITGB7, TNFSF12, TNFSF13, PTCRA, ITGA4, ITGA3, RNASET2, ITGA2, TNFRSF19, ITGA1, TNFRSF1A, NPC2, ITGA7, DSG2, ITGA5, ACPP, COL15A1, CIS, CIR, IL2RG, TSPAN31, CECR1, CCL2, FCGR1A, LRRC8E, CTHRC1, SLC12A3, GZMA, NAGA, GZMH, FCGR2A, IL2RA, IL2RB, PDCD1, FCGR2B, FCGR2C, PRF1, LDLRAD2, ICAM4, IFI30, LCTL, ICAM1, C4A, PTGFRN, EPHB2, SLC12A7, CER1, SLC34A2, C9ORF135, ENTPD2, MUSK, KCNK13, VWA5B1, FNDC7, SFRP4, FNDC1, MXRA8, CD226, EPHA1, MXRA5, CES1, LPAR1, CD1D, PCDH18, CD19, ARSJ, SLAMF8, ST8SIA4, ARS1, SLAMF7, SLAMF6, ARSF, CD14, A2M, APOB, ARSD, ARSE, SLAMF1, SLC10A4, CCR1, CTSA, MSR1, SLC10A6, TNFSF14, TNFSF13, PILRA, BST2, BST1, LPAR6, CALU, CD28, SDC1, CD27, NRP1, FKBP10, CD40, ECM2, CTSZ, SECTM1, GRIK1, CD3G, CTSW, CD3D, PCSK5, EDA2R, CTSS, CTSK, CD37, CCR7, CCR4, CD33, CTSC, CCR2, CTSB, CD53, IL10, CD52, IL15, ANO9, ANO6, MMEL1, OSMR, IL1A, CD48, CD44, CD63, RAMP3, SLC43A3, GBA, OS9, GPC3, CD58, MICB, CD74, CD72, YIPF1, DKKL1, GLB1L, CD69, CD68, CD86, CD80, MPL, LOXL3, LOXL4, PLAT, CELSR1, PLB1, LOXL2, FAM198A, PLAUI, FAM198B, CCR12, FAM3B, ENPP1, FAM3D, PAMR1, CD96, SCARA3, CD93, SPINK8, CYBB, PCOLCE, MR1, PRLR, PDGFRL, OSCAR, ADAM19, SCNN1G, PROCR, CD8B, SCNN1B, ADAM12, DPEP2, HHIP1, DPEP1, PLD5, KIR2DL4, VCAM1, CRTAM, RARRES1, LAYN, GGH, IL6, PROC, IL7, COL5A2, MANSC1, IL7R, LGALS3BP, TNFAIP6, LAMC3, CPXM2, SIRPB2, LAMC1, CA9, A4GALT, HS3ST3B1, MMP2, MMP9, MMRN1, TMEM217, CHI3L2, CHI3L1, LAMA2, PKD1L1, KDELC2, MAN1C1, TMEM209, OR51E1, GALNT5, GALNT4, GALNT3, EGF, TPBG, LAMB4, LAMB1, SOD3, GALT, CD2, CD4, CD6, CD5, CD7, PTX3, CPVL, GLA, SERPINE1, COL12A1, MRGPRF, GLDN, FGFR1L, GPR171, PRIMA1, CUBN, SERPINF1, SERPINF2, DKK1, GPR160, SERPING1, CFB, ENPEP, CFH, CFI, GNS, SERPINH1, PROM1, ICOS, HLA-DQA2, HLA-DQA1, FZD1, STI4, FZD3, FZD2, ACE, MCAM, FZD7, FZD6, PCDHB1, TNFSF8, SERPINA3, SERPINA1, PRSS23, PHEX, ASGR2, SERPINA5, ADAMTSL1, MRC2, GPR132, C1QTNF1, ADAMTSL4, TCTN2, TCTN1, EMB, TIMP1, HAVCR2, SERPINB2, SLC2A10, FCRL6, NFAM1, IFNGR2, BACE2, CD200R1, ANGPTL7, ANGPTL6, COL21A1, ANGPTL4, HLA-DQB1, ENG, NPSR1, GRN, GCNT1, AFP, GPNMB, OLFML3, OLFML1, AGA, APOL1, GPR156, RNF130, IL10RA, GPR1, SULF1, GPR141, TMEM158, TMEM159, CLCF1, PLP2, FMOD, CCL28, CSF3R, PROS1, TNC, CLU, CDH6, CDH4, PODNL1, LAMP3, CLEC5A, SLC39A8, IL13RA2, IL13RA1, IGFBP4, CD180, FKBP9, RHCG, SLC26A2, CD151, AEBP1, HMMR, CLEC7A, BTLA, IGFBP7, SLC15A3, CD300LF, PLTP, STRA6, CD164, SLC37A2, CD163, BTN2A2, CYBB1, PDXNL, C1ORF101, P4HA2, ALK, CPM, COL14A1, ADRA1D, TREM2, CPZ, TREM1, SCPEP1, ADAMTS3, ADAMTS1, EMILIN3, EMILIN2, EMILIN1, LBP, GAL3ST4, TRPC7, SLC13A3, CR1, VWF, ASPN, TNMD, PECAM1, FRRS1, UNC93B1, SEMA3A, FGL2, SEMA3F, P2RY8, P2RY6, TTR, P2RY2, P2RY1, IL21R, CEACAM21, TIGIT, MEST, ANGPT2, ANGPT1, MFAP5, MFAP4, NFASC, CLEC2B, P2RX1, PI15, EVI2B, FOLR1, CBLN3, UMODL1, AQP4, KLHDC7A, ANTXR2, AQP1, NIPAL2, SIL1, ICOSLG, HABP2, HLA-H, SLC6A16, IL1R1, SLC11A1, IL1R2, HLA-B, HLA-C, HLA-A, HLA-F, HLA-G, GBG1, HLA-E, TWSG1, CD109, HMSD, CD101, SLC22A4, GYPC, TMTC2, CD79B, OTOA, CDSN, LIF, GDF5, VASN, VNN1, VNN2, COL18A1, TRAM1, SLC44A3, RYR3, ERMAP, BTN3A1, INSRR, BTN3A3, PDCD1LG2, BTN3A2, IL17RC, NAALADL2, NAALADL1, TLR1, CEACAM1, B3GNT8, CDCP1, B3GNT7, B3GNT5, CEACAM4, TLR8, VWA1, FAM20C, TLR7, TLR6, FAM20A, CD302, TLR5, TLR3, MATN2, TLR2, LILRA6, PTGER4, C1QA, TNXB, PTGER1, PTGER2, AMIGO2, GDDP2, CXCR4, CXCR6, LILRA1, CST7, LILRA2, LILRA4, LILRA5, EGFLAM, CXCR3, CXCR2, SUSD3, LAIR1, MPZL2, GDF15, SUSD2, LILRB1, LILRB2, FAP, LRRN4CL, FAS, F2RL2, FCGBP, STEAP3, STEAP4, HFE, SIRPG, CLEC18C, CLEC18B, TMEM140, CLEC18A, SIT1, C1RL, SVEP1, POSTN, CD300A, EPDR1, COL4A2, LOX, COL4A1, APLNR, RELL1, CD300C, FBLN7, CHRNA1, KLRB1, CHRNA6, CHRNA9, FBLN1, CSF2RB, LTBP2, LTBP1, FBLN5, SCUBE2, DPP4, EFN2B, HRH1, MAN2A1, KLRC1, TGFB2, TGFB3, EPHX3, SLC2A9, NMUR1, KLRD1, ULBP2, FGFR1, ULBP3, ABCD2, MEGF10, PCDHGB3, SLC40A1, TMEM107, BDKRB2, BDKRB1, GUSB, ABCC3, PTGIR, PLAUR, WNT16, TGFB1, DCN, TGFB2, TMEM2, IGDC4, COL6A2, COL6A3, LTB, PAPP2, CDH19, LTF, COLEC12, CLEC12A, THBS2, THBS4, ACAN, MUC1, ERBB2, S1PR3, S1PR4, LGI4, PMP22, LTBR |
| Endoplasmic reticulum Lumen (p-adjusted value 5.19722 -04)                                                                                                                                                                                                                                                                                                                                                                                                                                                                                                                                                                                                                                                                                                                                                                                                                                                                                                                                                                                                                                                                                                                                                                                                                                                                                                                                                                                                                                                                                                                                                                                                                                                                                                                                                                    |                                                                                                                                                                                                                                                                                                                                                                                                                                                                                                                                                                                                                                                                                                                                                                                                                                                                                                                                                                                                                                                                                                                                                                                                                                                                                                                                                                                                                                                                                                                                                                                                                                                                                                                                                                                                                                                                                                                                                                                                                                                                                                                                                                                                                                                                                                                                                                                                                                                                                                                                                                                                                                                                                                                                                                                                                                                                                                                                                                                                                                                                                                                                                                                                                                                                                                                                                                                                                                                                                                                                                                                                                                                                                                                                                                                                                                                                                                                                                                                                                                                                                                                                                                                                                                                                                                                                                                                                                                                                                                                                                                                                                                                                                                                                                                                                                                                                                                                                                                                                                                                                                                                                                                                                                                                                                                                                                                                                                                                 |

| Genes Down-regulated                                           | Genes Up-regulated                                                                                                                                                                                                                                                                                                                                             |
|----------------------------------------------------------------|----------------------------------------------------------------------------------------------------------------------------------------------------------------------------------------------------------------------------------------------------------------------------------------------------------------------------------------------------------------|
| SPON1, WNT7B, COL7A1                                           | FKBP10, COL18A1, SERPINA1, COL14A1, COL12A1, CTSZ, ADAMTSL1, LIPC, ADAMTSL4, B2M, SIL1, CTSC, RNASET2, GPX8, PLAUR, PDIA5, PDIA4, SUMF1, COL4A2, COL4A1, COL6A2, COL8A2, COL6A3, COL8A1, COL21A1, RDH5, ERP27, CES1, COL15A1, MTTP, PDGFA, OS9, KDELC2, ARSJ, SERPINH1, ARSJ, ARSF, ARSD, APOB, ARSE, COL1A1, COL3A1, CD4, PROC, COL1A2, COL5A1, P4HA2, COL5A2 |
| <b>Endocytic vesicle membrane (p-adjusted value 1.729E-02)</b> |                                                                                                                                                                                                                                                                                                                                                                |
| Genes Down-regulated                                           | Genes Up-regulated                                                                                                                                                                                                                                                                                                                                             |
| GRIA2, WNT7B, PTCH1, DLG4, CACNG2, GRIA3, GRIA4                | OLEC12, MSRI, CD74, CD163, HLA-DRB5, CAV1, HLA-DPB1, HLA-DRA, HLA-DQA2, HLA-DQA1, HLA-DQB2, HLA-DRB1, HLA-DPA1, HLA-DQB1                                                                                                                                                                                                                                       |
| <b>Proteoglycans in cancer (p-adjusted value 2.85869-04)</b>   |                                                                                                                                                                                                                                                                                                                                                                |
| Genes Down-regulated                                           | Genes Up-regulated                                                                                                                                                                                                                                                                                                                                             |
| MYC, PRKCG, PRKCB, PIK3R1, WNT10B, WNT7B, PTCH1                | ITGB1, ITGB3, PIK3CD, FASLG, PIK3CG, PLAU, PLCE1, HGF, MMP2, ITGA2, PLAUR, WNT16, HSPG2, MMP9, DCN, HCLS1, ITGA5, CD44, TLR2, CD63, SDC4, TWIST1, IQGAP1, HOXD10, EGFR, PIK3R5, RRAS, ERBB2, GPC3, PLCG2, FLNA, FLNC, FZD1, TGFB2, FZD3, FZD2, CAV2, LUM, FZD7, CAV1, FZD6, IGF2, FN1, MSN, FAS, SDC1, PTPN6, FGFR1                                            |
| <b>Proteoglycan (p-adjusted value 1.766833 E-03)</b>           |                                                                                                                                                                                                                                                                                                                                                                |
| Genes Down-regulated                                           | Genes UP-regulated                                                                                                                                                                                                                                                                                                                                             |
| BCAN, VCAN, TNF, CSPG5                                         | CD74, NRP1, SDC4, LUM, BGN, CXCR4, HSPG2, DCN, ACAN, SRPX2, GPC3, SDC1, FMOD, CD44                                                                                                                                                                                                                                                                             |

**Supplementary Table S9.** Genes and pathways identified with increased glioma grade and TMEM230 upregulation in patients with astrocytoma. TMEM230 regulates motor protein dependent intracellular trafficking and secretion of metalloproteinases (ADAMs and MMPs) and phagosomes for microchannel formation as identified in ODG. Expression analysis correlated all genes differentially expressed with up-regulation of TMEM230 (p adjusted value of < or = 0.05, Supplementary Table 1). Gene Ontology and biological pathways were assessed using the False Discovery Rate method.

| <b>Trafficking and secretion associated genes modulated in ASTROCYTOMA with TMEM230-high vs TMEM230-low</b>                                                                                                                                                                                                                                                                                                                                                    |                                                                                                                                                                                                                                                                                                                                                                                                                                                                                                                                                                                                                                                                                                                                                                                                                                                                                                                                                                                                                                                                                                                                                                                                                                                                                                                                                                                                                                                                                                                                                                                                                                                                                                                                                                                                                                                                                                                                                                                                                                                                                                                                                                                                                                                                                                                              |
|----------------------------------------------------------------------------------------------------------------------------------------------------------------------------------------------------------------------------------------------------------------------------------------------------------------------------------------------------------------------------------------------------------------------------------------------------------------|------------------------------------------------------------------------------------------------------------------------------------------------------------------------------------------------------------------------------------------------------------------------------------------------------------------------------------------------------------------------------------------------------------------------------------------------------------------------------------------------------------------------------------------------------------------------------------------------------------------------------------------------------------------------------------------------------------------------------------------------------------------------------------------------------------------------------------------------------------------------------------------------------------------------------------------------------------------------------------------------------------------------------------------------------------------------------------------------------------------------------------------------------------------------------------------------------------------------------------------------------------------------------------------------------------------------------------------------------------------------------------------------------------------------------------------------------------------------------------------------------------------------------------------------------------------------------------------------------------------------------------------------------------------------------------------------------------------------------------------------------------------------------------------------------------------------------------------------------------------------------------------------------------------------------------------------------------------------------------------------------------------------------------------------------------------------------------------------------------------------------------------------------------------------------------------------------------------------------------------------------------------------------------------------------------------------------|
| <b>Secreted (p-adjusted value 5.30206E-27)</b>                                                                                                                                                                                                                                                                                                                                                                                                                 |                                                                                                                                                                                                                                                                                                                                                                                                                                                                                                                                                                                                                                                                                                                                                                                                                                                                                                                                                                                                                                                                                                                                                                                                                                                                                                                                                                                                                                                                                                                                                                                                                                                                                                                                                                                                                                                                                                                                                                                                                                                                                                                                                                                                                                                                                                                              |
| Genes Down-regulated                                                                                                                                                                                                                                                                                                                                                                                                                                           | Genes Up-regulated                                                                                                                                                                                                                                                                                                                                                                                                                                                                                                                                                                                                                                                                                                                                                                                                                                                                                                                                                                                                                                                                                                                                                                                                                                                                                                                                                                                                                                                                                                                                                                                                                                                                                                                                                                                                                                                                                                                                                                                                                                                                                                                                                                                                                                                                                                           |
| IGLN5, FAM19A1, CHGB, BCAN, GPLD1, ADAMTS19, FLRT1, WNT10B, BTBD17, SSPO, WIFKKN1, C1QTNF4, RSPO3, TMEFF2, ANGPTL2, WNT7B, PRSS37, PRSS35, SMOC1, FGF9, TNF, OLFM1, IGFALS, AMH, C1QL4, ADAMTS20, CRH, VSTM2A, LUZP2, NTN4, THSD4, TUB, ANGPT4, SST, CBLN2, CBLN1, SPON1, EYS, STX1A, EPHA10, PCDH15, NMB, CRTAC1, NOG, MST1, DNASE1L2, NPW, CGREF1, CA11, GABBR1, LY6G5B, DSCAM, SCG3, MASP2, LPL, TAC1, FGF17, BMP2, HAPLN1, CORT, VCAN, SLIT1, CHGA, COL7A1 | ADAMDEC1, TFRC, COL12A1, SERPINE1, GLDN, ISLR, LIPC, NAMPT, VSTM1, SERPINF1, SERPINF2, RNASE6, RNASE4, RNASE3, HSPG2, DKK1, SPINT1, SERPING1, CFB, CFD, CFH, DHH, CFI, PDGFA, PLA2G5, C2, C3, ADAMTS14, C6, C7, SCGB1D2, S100A13, SFN, ICOS, GSDMD, ACE, FUCA2, FN1, LYZ, CP, COL1A1, COL1A2, HAMP, SERPINA3, SERPINA1, ELN, ADM, PRSS23, SERPINA5, ADAMTSL1, C1QTNF2, MMP25, C1QTNF1, ADAMTSL4, GNLY, TCTN1, OLR1, TIMP1, ANXA1, FGFBP2, SERPINB2, ANXA2, BGN, F3, MMP11, CD200R1, ANGPTL7, ANGPTL6, COL21A1, ANGPTL4, CRB2, GRN, CTF1, AFP, FSTL1, EGFR, APOL4, SRPX2, CNPY4, FRZB, OLFML3, OLFML1, SPP1, APOL1, C11ORF45, GSN, RNLS, CCL20, VWA3A, COL3A1, LRG1, CLCF1, C16ORF89, SIGLEC1, FMOD, CCL28, OLFML2B, CSF3R, PROS1, HP, TNC, F13A1, IL1RAP, FGF1, OLFML2A, CLU, CXCL14, EFEMP2, PODNL1, EFEMP1, IBSP, IGFBP5, IGFBP4, IGFBP2, THNSL2, PLA2R1, S100A9, S100A8, LY96, C1ORF54, TNFRSF11B, AEBP1, IGFBP7, IGFBP6, PLTP, CPA5, CPA4, CD164, CD163, TFPI2, LY86, PXDN1, CXCL10, CXCL11, OGN, RLN2, ANXA2P2, COL14A1, LECT1, FASLG, TREM2, TRH, CPZ, TREM1, WISP1, TNFSF13B, SCPEP1, FCGR3A, FCGR3B, ADAMTS3, MDK, ADAMTS1, EMILIN3, EMILIN2, EMILIN1, TNFSF12-TNFSF13, LBP, VWF, RNASET2, ASPN, TNFRSF1A, NPC2, XCL2, XCL1, ANG, ACPP, COL15A1, SEMA3A, FGL2, TULP2, SEMA3F, CECR1, TTR, CCL5, CCL2, CTHRC1, ANGPT2, ANGPT1, GZMA, MSMP, APLN, MFAP5, GZMK, MFAP4, APOC2, APOC1, PI15, FOLR1, CBLN3, SPON2, PRF1, ICAM4, IFI30, ANTXR2, C4A, LGALS3, LGALS1, LGALS9, B2M, CER1, HABP2, IL1R1, IL1R2, HLA-C, VWA5B1, FNDC7, CHIT1, SFRP4, TWSG1, SLPI, FNDC1, CRISPLD1, HMSD, COL8A2, COL8A1, MXRA5, SDC4, OTOA, ARSJ, ARSJ, ARSF, CD14, A2M, APOB, SLAMF1, CDSN, TNFSF14, TNFSF13, IGF2, LIF, PILRA, GDF5, VASN, CALU, SDC1, NRP1, COL18A1, CD40, ECM2, SEXTM1, PCSK5, ESM1, CTSB, IL10, IL15, IL18, IL16, MMEL1, PDCD1LG2, OTOS, IL1A, CEACAM1, CDCP1, TFF3, VWA1, FAM20C, FAM20A, MATN2, C1QB, C1QA, CD63, TNXB, CAPG, CST7, LILRA2, LILRA5, CST3, EGFLAM, GPC3, IL32, GDF15, DKK1, LILRB1, CD40LG, FAP, GLB1L, SAA1, SAA2, FAS, C1QC, FCGBP, CLEC18C, LOXL3, LOXL4, CLEC18B, PLAT, CLEC18A, LOXL1, LOXL2, FAM198A, PLAUR, C1RL, FAM3B, ENPP1, FAM3D, SVEP1, FAM150B, PAMR1, POSTN, SPINK8, EPDR1, PCOLCE, NPNT, MRL1, PRLR, PDGFRL, OSCAR, COL4A2, CD8B, LOX, COL4A1, CD8A, ADAM12, HHIPL2, FBLN7, HTRA3, FBLN1, |



|                                                     |                                                                                                                                                                                                                                                                                                                                                                                                                                   |
|-----------------------------------------------------|-----------------------------------------------------------------------------------------------------------------------------------------------------------------------------------------------------------------------------------------------------------------------------------------------------------------------------------------------------------------------------------------------------------------------------------|
|                                                     | LTBP2, NTS, LTBP1, FBLN5, SCUBE2, DPP4, C6ORF15, CHAD, FGF20, CYTL1, TGFB2, TGFB3, RARRES2, GGH, EPHX3, ISG15, SSC5D, IL6, PROC, COL5A1, IL7, COL5A2, TGFB1, ULBP2, IL7R, LGALS3BP, CXCL9, C2ORF40, LAMC3, CPXM2, LAMC1, CASP4, MMP7, MMP2, PLAUR, WNT16, MMP9, DCN, MMRN1, OAS1, COL6A2, CHI3L2, CHI3L1, COL6A3, PAPP2, LTF, LAMA2, C2ORF66, THBS4, ACAN, MUC1, GBP1, LGI4, LUM, PLA2G2A, LAMB4, LAMB1, SOD3, CD6, C9ORF47, PTX3 |
| <b>Phagosome (p-adjusted value 8.113E-09)</b>       |                                                                                                                                                                                                                                                                                                                                                                                                                                   |
| <b>Genes Down-regulated</b>                         | <b>Genes Up-regulated</b>                                                                                                                                                                                                                                                                                                                                                                                                         |
| MRC1, ATP6V1G2, TUBA8                               | TGB1, NCF1, TFRC, NCF2, ITGB3, NCF4, ITGB2, TCIRG1, CTSS, MRC2, TUBA1C, TUBB6, FCGR3A, FCGR3B, SEC61G, OLR1, HLA-DOA, HLA-DOB, HLA-DPA1, ITGA2, HLA-B, HLA-C, TAP1, CYBA, HLA-A, HLA-F, HLA-G, HLA-E, TLR6, ITGA5, PLA2R1, HLA-DQB1, TLR2, COLEC12, C1R, THBS2, THBS4, C3, HLA-DMA, HLA-DMB, CLEC7A, CD14, FCGR1A, HLA-DQA2, HLA-DQA1, MSR1, HLA-DRB5, FCGR2A, HLA-DPB1, HLA-DRA, FCGR2B, FCGR2C, HLA-DRB1                        |
| <b>Motor protein (p-adjusted value 1.240764-03)</b> |                                                                                                                                                                                                                                                                                                                                                                                                                                   |
| <b>Genes Down-regulated</b>                         | <b>Genes Up-regulated</b>                                                                                                                                                                                                                                                                                                                                                                                                         |
| KIF21B, KIF3C, MYO5A, DNMI, MYO16, DNMI3, KIF26A    | DNAH2, ACAA2, DNAH5, DNAH6, KIF14, DNAH9, MYL12A, DNALI1, KIF15, DNAI1, DNAH12, DNAH11, DNAI2, DYNLT3, KIF24, KIF23, MYO1E, CENPE, KIF18A, KIF9, KIF16B, KIF4A, MYO5B, MYO5C, DYNLRB2, KIF2C, KIF20A, MYO1                                                                                                                                                                                                                        |

**Supplementary Table S10.** Genes and pathways identified with increased glioma grade and TMEM230 upregulation in astrocytoma. TMEM230 promoted upregulation of glycoproteins and angiogenesis in highly vascularized infiltrating astrocytoma. Expression analysis correlated all genes differentially expressed with up-regulation of TMEM230 (p adjusted value of < or = 0.05, Supplementary Table 1). Gene Ontology and biological pathways were assessed using the False Discovery Rate method.

| <b>Glycoproteins and angiogenesis associated genes modulated in ASTROCYTOMA with TMEM230-high vs TMEM230-low</b>                                      |                                                                                                                                                                                                                                                                                                                                                                                                                                                                                                                                                                                                                                                                                                                                                                                                                                                                                                                                                                                                                                                                                                                                                                                                                                                                                                                                                                                                                                                                                                                                                                                                                                                                                                                                                                                                                                                                                                                                                                                                                                                                                                                                                                                                                                                                                                                                                                                                                                                                                                                                                                                                                                                                                                                                                                |
|-------------------------------------------------------------------------------------------------------------------------------------------------------|----------------------------------------------------------------------------------------------------------------------------------------------------------------------------------------------------------------------------------------------------------------------------------------------------------------------------------------------------------------------------------------------------------------------------------------------------------------------------------------------------------------------------------------------------------------------------------------------------------------------------------------------------------------------------------------------------------------------------------------------------------------------------------------------------------------------------------------------------------------------------------------------------------------------------------------------------------------------------------------------------------------------------------------------------------------------------------------------------------------------------------------------------------------------------------------------------------------------------------------------------------------------------------------------------------------------------------------------------------------------------------------------------------------------------------------------------------------------------------------------------------------------------------------------------------------------------------------------------------------------------------------------------------------------------------------------------------------------------------------------------------------------------------------------------------------------------------------------------------------------------------------------------------------------------------------------------------------------------------------------------------------------------------------------------------------------------------------------------------------------------------------------------------------------------------------------------------------------------------------------------------------------------------------------------------------------------------------------------------------------------------------------------------------------------------------------------------------------------------------------------------------------------------------------------------------------------------------------------------------------------------------------------------------------------------------------------------------------------------------------------------------|
| <b>Glycoprotein (p-adjusted value 8.74481E-74)</b>                                                                                                    |                                                                                                                                                                                                                                                                                                                                                                                                                                                                                                                                                                                                                                                                                                                                                                                                                                                                                                                                                                                                                                                                                                                                                                                                                                                                                                                                                                                                                                                                                                                                                                                                                                                                                                                                                                                                                                                                                                                                                                                                                                                                                                                                                                                                                                                                                                                                                                                                                                                                                                                                                                                                                                                                                                                                                                |
| <b>Genes Down-regulated</b>                                                                                                                           | <b>Genes Up-regulated</b>                                                                                                                                                                                                                                                                                                                                                                                                                                                                                                                                                                                                                                                                                                                                                                                                                                                                                                                                                                                                                                                                                                                                                                                                                                                                                                                                                                                                                                                                                                                                                                                                                                                                                                                                                                                                                                                                                                                                                                                                                                                                                                                                                                                                                                                                                                                                                                                                                                                                                                                                                                                                                                                                                                                                      |
| NDST4, IGLON5, UNC5A, CACNA2D3, CACNA2D2, ADAMTS19, PRRT2, BTBD17, CADM2, GRIN3A, STRC, WFIKKN1, KCNC1, GPR21, TMEFF2, CHST1, DSCAML1, GPR45, ADAM29, | ADAMDEC1, TFRC, F11R, IL4I1, ISLR, LIPC, C3AR1, VSTM1, RNASE6, RNASE3, RNASE2, HSPG2, SPINT1, AGTR1, PLBD1, HS3ST3A1, ABCB4, FPR1, IL20RA, CLCNKB, PDGFA, FPR3, FPR2, C2, C3, ADAMTS14, C6, C7, KCNMB1, C19ORF38, NGFR, HLA-DRB5, ABCA5, FUCA1, APCDD1L, FUCA2, FN1, CP, COL1A1, IL22RA1, COL1A2, DCHS2, NOX4, FXYD5, GPR18, HLA-DRB1, PIGT, SIGLEC9, HEXB, LRRC32, MMP25, OLR1, CTLA4, CTBS, HLA-DPA1, IKBIP, GPR39, CHST6, GPR37, BGN, EMP2, EMP3, F3, SUMF1, PIGB, GPRC5A, SLC7A7, TMEM106C, TLR10, HCST, CHST2, CRB2, LRRC15, PTAFR, CLECL1, ABCB11, FSTL1, EGFR, SLC7A3, PTGS1, HLA-DMA, SRPX2, HLA-DMB, FRZB, GPA33, TMEM67, SPP1, C11ORF45, IL12RB1, LRRC25, EVC2, P2RY10, SMAGP, GPR55, ADAM33, VWA3A, PLXDC2, DCBLD2, COL3A1, LRG1, SLC03A1, HLA-DPB1, SIGLEC1, LGR6, SIGLEC7, SIGLEC5, OLFML2B, GPR65, HP, LY75, F13A1, PLOD3, IL1RAP, OLFML2A, EFEMP2, EFEMP1, IBSP, ADORA3, ADORA1, HLA-DOA, HLA-DOB, TNFRSF4, TPST1, NAAA, ROR1, ROR2, PLA2R1, C21ORF62, DSC2, CHODL, CD274, KCNE1, KCNE3, KCNE4, ECSCR, TACSTD2, LY96, TNFRSF11B, GPR84, GPR82, TMEM26, TNFRSF14, CPA4, CD276, TFP12, B3GALT4, TNFRSF10C, LY86, LRRC66, TMEM17, PTPRC, OGN, HLA-DRA, KCNK5, ITGB1, MOXD1, ST6GALNAC2, ITGB4, ITGB3, ITGB2, LECT1, FASLG, ECE1, ITGAL, WISP1, TNFSF13B, SPN, FCGR3A, FCGR3B, ITGB8, ITGB7, TNFSF12-TNFSF13, PTCRA, ITGA4, ITGA3, RNASET2, ITGA2, TNFRSF19, ITGA1, TNFRSF1A, NPC2, ITGA7, DSG2, ITGA5, ACPP, COL15A1, C1S, C1R, IL2RG, TSPAN31, CECR1, CCL5, CCL2, FCGR1A, LRRC8E, CTHRC1, SLC12A3, GZMA, NAGA, GZMH, FCGR2A, IL2RA, IL2RB, CD248, PDCD1, FCGR2B, FCGR2C, SPON2, PRF1, LDLRAD2, ICAM4, IFI30, LCTL, ICAM1, C4A, PTGFRN, EPHB2, SLC12A7, CER1, SLC34A2, C9ORF135, ENTPD2, MUSK, KCNK13, VWA5B1, FNDC7, SFRP4, FNDC1, MXRA8, CD226, EPHA1, MXRA5, CES1, SDC4, LPAR1, CD1D, PCDH18, CD19, ARSJ, SLAMF8, ST8SIA4, ARSJ, SLAMF7, SLAMF6, ARSF, CD14, A2M, APOB, ARSD, ARSE, SLAMF1, SLC10A4, CCR1, CTSA, MSR1, SLC10A6, TNFSF14, TNFSF13, IGF2, PILRA, BST2, BST1, LPAR6, CALU, CD28, SDC1, CD27, NRP1, FKBP10, CD40, ECM2, CTSZ, SECTM1, GRIK1, CD3G, CTSW, CD3D, PCSK5, EDA2R, CTSS, CTSK, RAC2, CD37, CCR7, CCR5, CCR4, CD33, CTSC, CCR2, CTSB, CD53, IL10, CD52, IL15, ANO9, ANO6, MMEL1, OSMR, IL1A, CD48, CD44, CD63, TMPRSS7, RAMP3, SLC43A3, GBA, OS9, GPC3, CD58, MICA, MICB, CD74, CD72, YIPF1, DKKL1, XG, GLB1L, CD69, CD68, CD86, CD80, MPL, LOXL3, LOXL4, PLAT, CELSR1, PLB1, LOXL2, FAM198A, PLAUI, MPZ, FAM198B, CCRL2, FAM3B, ENPP1, FAM3D, PAMR1, CD96, SCARA3, CD93, SPINK8, CYBB, PCOLCE, MRI, PRLR, PDGFR, OSCAR, ADAM19, SCNN1G, PROCR, CD8B, SCNN1B, ADAM12, DPEP2, HHIPL2, DPEP1, PLD5, KIR2DL4, CHAD, C16ORF54, VCAM1, CRTAM, LAYN, GGH, IL6, PROC, IL7, COL5A2, MANSC1, IL7R, LGALS3BP, TNFAIP6, LAMC3, CPXM2, |

|                                                                     |                                                                                                                                                                                                                                                                                                                                                                                                                                                                                                                                                                                                                                                                                                                                                                                                                                                                                                                                                                                                                                                                                                                                                                                                                                                                                                                                                                                                                                                                                                                                                                                                                                                                                                                                                                                                                                                                                                                                                                                                                                                                                                                                                                                                                                                                                                                                                                                                                                                                                                                                                                                                                                                                                                                                                                                                                                                                                                                                                                                                                                                                                        |
|---------------------------------------------------------------------|----------------------------------------------------------------------------------------------------------------------------------------------------------------------------------------------------------------------------------------------------------------------------------------------------------------------------------------------------------------------------------------------------------------------------------------------------------------------------------------------------------------------------------------------------------------------------------------------------------------------------------------------------------------------------------------------------------------------------------------------------------------------------------------------------------------------------------------------------------------------------------------------------------------------------------------------------------------------------------------------------------------------------------------------------------------------------------------------------------------------------------------------------------------------------------------------------------------------------------------------------------------------------------------------------------------------------------------------------------------------------------------------------------------------------------------------------------------------------------------------------------------------------------------------------------------------------------------------------------------------------------------------------------------------------------------------------------------------------------------------------------------------------------------------------------------------------------------------------------------------------------------------------------------------------------------------------------------------------------------------------------------------------------------------------------------------------------------------------------------------------------------------------------------------------------------------------------------------------------------------------------------------------------------------------------------------------------------------------------------------------------------------------------------------------------------------------------------------------------------------------------------------------------------------------------------------------------------------------------------------------------------------------------------------------------------------------------------------------------------------------------------------------------------------------------------------------------------------------------------------------------------------------------------------------------------------------------------------------------------------------------------------------------------------------------------------------------------|
|                                                                     | <p>SIRPB2, LAMC1, CA9, A4GALT, HS3ST3B1, MMP2, MMP9, MMRN1, TMEM217, CHI3L2, CHI3L1, LAMA2, PKD1L1, KDELC2, MAN1C1, TMEM209, OR51E1, GALNT5, GALNT4, GALNT3, EGF, TPBG, LAMB4, LAMB1, SOD3, GALT, CD2, CD4, CD6, CD5, CD7, PTX3, VIM, CPVL, GLA, SERPINE1, COL12A1, MRGPRF, GLDN, FGFR1, GPR171, PRIMA1, CUBN, SERPINF1, SERPINF2, DKK1, GPR160, SERPING1, CFB, ENPEP, CFH, CFI, GNS, SERPINH1, PROM1, ICOS, HLA-DQA2, HLA-DQA1, FZD1, ST14, FZD3, FZD2, ACE, MCAM, FZD7, FZD6, PCDHB1, SNAI1, TNFSF8, SERPINA3, SERPINA1, PRSS23, PHEX, ASGR2, SERPINA5, ADAMTSL1, MRC2, GPR132, C1QTNF1, ADAMTSL4, TCTN2, TCTN1, EMB, TIMP1, HAVCR2, SERPINB2, SLC2A10, FCRL6, NFAM1, IFNGR2, BACE2, CD200R1, ANGPTL7, ANGPTL6, COL21A1, ANGPTL4, HLA-DQB2, HLA-DQB1, ENG, NPSR1, GRN, GCNT1, AFP, GPNMB, OLFML3, OLFML1, AGA, APOL1, GPR156, RNF130, IL10RA, GPR1, SULF1, GPR141, TMEM158, TMEM159, CLCF1, C16ORF89, PLP2, FMOD, SLC28A1, CCL28, CSF3R, PROS1, TNC, CLU, CDH6, CDH4, PODNL1, LAMP3, CLEC5A, SLC39A8, GYG2, IL13RA2, IL13RA1, IGFBP5, IGFBP4, IGFBP2, CD180, FKBP9, RHCG, SLC26A2, CD151, AEBP1, HMMR, CLEC7A, BTLA, IGFBP7, IGFBP6, SLC15A3, CD300LE, PLTP, STRA6, CD164, SLC37A2, CD163, BTN2A2, CYBRD1, PXDNL, C1ORF101, P4HA2, ALK, CPM, COL14A1, ADRA1D, TREM2, CPZ, TREM1, SCPEP1, ADAMTS3, ADAMTS1, EMILIN3, EMILIN2, EMILIN1, LBP, GAL3ST4, TRPC7, SLC13A3, CR1, VWF, ASPN, TNMD, PECAM1, FRRS1, UNC93B1, SEMA3A, FGL2, SEMA3F, P2RY8, P2RY6, TTR, P2RY2, P2RY1, IL21R, CEACAM21, TIGIT, MEST, ANGPT2, ANGPT1, MFAP5, MFAP4, NFASC, CLEC2B, APOC2, P2RX1, PI15, EVI2B, FOLR1, CBLN3, UMODL1, AQP4, KLHDCA7, ANTXR2, AQP1, NIPAL2, B2M, SIL1, ICOSLG, HABP2, HLA-H, ACSL1, SLC6A16, IL1R1, SLC11A1, IL1R2, HLA-B, HLA-C, HLA-A, HLA-F, GBGT1, HLA-G, CHIT1, TWSG1, CD109, HMSN, CD101, SLC22A4, GYPC, TMTC2, CD79B, OTOA, TRPM8, CDSN, LIF, GDF5, VASN, VNN1, VNN2, COL18A1, TRAM1, SLC44A3, ESM1, ERMAP, BTN3A1, INSRR, BTN3A3, PDCD1LG2, BTN3A2, IL17RC, NAALADL2, NAALADL1, TLR1, CEACAM1, B3GNT8, CDCP1, B3GNT7, B3GNT5, CEACAM4, TLR8, VWA1, FAM20C, RDH5, TLR7, TLR6, FAM20A, CD302, TLR5, TLR3, MATN2, TLR2, C1QB, LILRA6, PTGER4, C1QA, TNXB, PTGER1, PTGER2, AMIGO2, GSDPD2, CXCR4, CXCR6, LILRA1, CST7, LILRA2, LILRA4, LILRA5, CST3, EGFLAM, CXCR3, PDPN, CXCR2, SUSD3, LAIR1, MPZL2, GDF15, SUSD2, LILRB1, LILRB2, CD40LG, FAP, LRRN4CL, FAS, F2RL2, C1QC, FCGBP, STEAP3, STEAP4, HFE, SIRPG, CLEC18C, CLEC18B, TMEM140, CLEC18A, SIT1, C1RL, SVEP1, POSTN, CD300A, HGF, EPDR1, COL4A2, LOX, COL4A1, APLNR, HIST1H2BE, RELL1, CD300C, HIST1H2BC, FBLN7, CHRNA1, KLRB1, CHRNA6, CHRNA9, FBLN1, CSF2RB, LTBP2, LTBP1, FBLN5, SCUBE2, DPP4, EFN2, HRH1, MAN2A1, KLR1, TGFB2, TGFB3, CLEC17A, EPHX3, SSC5D, SLC2A9, KIF18A, TMEM119, NMUR1, KLRD1, ULBP2, FGFR1, ULBP3, ABCD2, MEGF10, PCDHGB3, SLC40A1, TMEM107, BDKRB2, BDKRB1, GUSB, ABCC3, PTGIR, PLAUR, WNT16, TGFB1, DCN, TGFB2, TMEM2, IGDCC4, OAS2, COL6A2, COL6A3, LT, PAPPA2, CDH19, LTF, COLEC12, CLEC12A, HIST1H2BJ, HIST1H2BK, THBS2, THBS4, ACAN, MUC1, ERBB2, S1PR3, S1PR4, LGI4, LUM, PMP22, LTBR</p> |
|                                                                     |                                                                                                                                                                                                                                                                                                                                                                                                                                                                                                                                                                                                                                                                                                                                                                                                                                                                                                                                                                                                                                                                                                                                                                                                                                                                                                                                                                                                                                                                                                                                                                                                                                                                                                                                                                                                                                                                                                                                                                                                                                                                                                                                                                                                                                                                                                                                                                                                                                                                                                                                                                                                                                                                                                                                                                                                                                                                                                                                                                                                                                                                                        |
| <b>Angiogenesis associated genes (p-adjusted value 1.02218E-05)</b> |                                                                                                                                                                                                                                                                                                                                                                                                                                                                                                                                                                                                                                                                                                                                                                                                                                                                                                                                                                                                                                                                                                                                                                                                                                                                                                                                                                                                                                                                                                                                                                                                                                                                                                                                                                                                                                                                                                                                                                                                                                                                                                                                                                                                                                                                                                                                                                                                                                                                                                                                                                                                                                                                                                                                                                                                                                                                                                                                                                                                                                                                                        |
| <b>Genes Down-regulated</b>                                         | <b>Genes Up-regulated</b>                                                                                                                                                                                                                                                                                                                                                                                                                                                                                                                                                                                                                                                                                                                                                                                                                                                                                                                                                                                                                                                                                                                                                                                                                                                                                                                                                                                                                                                                                                                                                                                                                                                                                                                                                                                                                                                                                                                                                                                                                                                                                                                                                                                                                                                                                                                                                                                                                                                                                                                                                                                                                                                                                                                                                                                                                                                                                                                                                                                                                                                              |
| TMEM100, FGF9, EPHB1, NRXN1, ANGPT4, SEMA4A                         | <p>OL18A1, NRP1, SERPINE1, TNFAIP2, FGF1, MEOX2, SAT1, PIK3CG, ELK3, ESM1, CYP11B1, TNFSF12-TNFSF13, EPHB2, HOXA7, HTATIP2, VAV3, WARS, TNFRSF12A, ANXA2, SYK, MMP2, IL18, HSPG2, MMP14, CEACAM1, COL4A2, ANGPTL6, COL8A2, PECAM1, HOXB3, COL8A1, ANG, ANGPTL4, ITGA5, EPHA1, COL15A1, ENPEP, SHC1, SH2D2A, ECSCR, PDGFA, PIK3R6, TYMP, SRPX2, CXCR3, CCL2, HMOX1, TGFB2, ANGPT2, ANGPT1, EGF, MCAM, CAV1, FN1, TBX4, MEIS1, FAP, TGFB1, FGFR1</p>                                                                                                                                                                                                                                                                                                                                                                                                                                                                                                                                                                                                                                                                                                                                                                                                                                                                                                                                                                                                                                                                                                                                                                                                                                                                                                                                                                                                                                                                                                                                                                                                                                                                                                                                                                                                                                                                                                                                                                                                                                                                                                                                                                                                                                                                                                                                                                                                                                                                                                                                                                                                                                     |

**Supplementary Table S11.** Genes identified with increased glioma grade and TMEM230 upregulation in hypoxia in ODG and Astrocytoma. Expression analysis correlated all genes differentially expressed with up-regulation of TMEM230 (p adjusted value of < or = 0.05, Supplementary Table 1). Gene Ontology and biological pathways were assessed using the False Discovery Rate method as shown.

| <b>Hypoxia gene modulated in ODG with TMEM230-high vs TMEM230-low</b> |                                                                                                                                                                                                                                          |
|-----------------------------------------------------------------------|------------------------------------------------------------------------------------------------------------------------------------------------------------------------------------------------------------------------------------------|
| <b>Response to Hypoxia (p-adjusted value 2.702229E-03)</b>            |                                                                                                                                                                                                                                          |
| <b>Genes Down-regulated</b>                                           | <b>Genes Up-regulated</b>                                                                                                                                                                                                                |
| CHRNA4, DRD2, CHRN2, PRKCB, CBFA2T3, BMP2                             | <p>PLAT, TRH, PLOD1, THBS1, ASCL2, DPP4, PDLIM1, LDHA, PLAUR, UCP2, CASP1, PTK2B, HMOX1, CA9, TGFB2, POSTN, MYOCD, TGFB1, VCAM1, ITGA2, AGTRAP, CYBA, ATP1B1, WTIP, SOD2, MT3, SOD3, NR4A2, TGFB3, ALDH3A1, MMP14, CXCL12, ANG, TLR2</p> |
|                                                                       |                                                                                                                                                                                                                                          |

| Hypoxia gene modulated in ASTROCYTOMA with TMEM230-high vs TMEM230-low |                                                                                                                                                                                                                                                   |
|------------------------------------------------------------------------|---------------------------------------------------------------------------------------------------------------------------------------------------------------------------------------------------------------------------------------------------|
| Response to Hypoxia (p-adjusted value 3.42166E-2)                      |                                                                                                                                                                                                                                                   |
| Genes Down-regulated                                                   | Genes Up-regulated                                                                                                                                                                                                                                |
| CHRNA4, DRD2, CHRNA2, PRKCB, CBFA2T3, BMP2                             | CXCR4, ADM, PLAT, TRH, ASCL2, LOXL2, DPP4, PDLIM1, CST3, MUC1, PLAU, UCP2, CASP1, ADORA1, CCL2, HMOX1, CA9, TGFB2, POSTN, ANGPT2, VCAM1, TGFB3, MMP2, CAV1, ITGA2, AGTRAP, CYBA, SOD2, SOD3, TGFB2, ALDH3A1, MMP14, NOX4, ANG, ANGPTL4, ENG, TLR2 |
